1 **Characterization of genomic regulation profiles in human mitral valve whole**  
2 **tissue to annotate genetic risk loci for mitral valve prolapse**

3

4 Sergiy Kyryachenko<sup>1</sup>, PhD\*, Adrien Georges<sup>1</sup>, PhD\*, Mengyao Yu<sup>1</sup>, PhD\*, Takiy Barrassou<sup>1</sup>,  
5 PhD, Patrick Bruneval<sup>1</sup>, MD, PhD, Tony Rubio<sup>2,3</sup>, MSc, Judith Gronwald<sup>2,3</sup>, Hassina Baraki<sup>3,4</sup>,  
6 MD, Ingo Kutschka<sup>3,4</sup>, MD, Russell. A Norris<sup>5,6</sup>, PhD, Niels Voigt<sup>2,3</sup>, MD, Nabila Bouatia-Naji<sup>1</sup>,  
7 PhD

8

9 1. Université de Paris, PARCC, Inserm, Paris, France

10 2. Institute of Pharmacology and Toxicology, University Medical Center Göttingen, Germany

11 3. DZHK (German Center for Cardiovascular Research), Partner Site Göttingen, Germany

12 4. Department of Thoracic and Cardiovascular Surgery, University Medical Center, Göttingen,  
13 Germany

14 5. Department of Regenerative Medicine and Cell Biology, Medical University of South  
15 Carolina, Charleston, SC, USA;

16 6. Department of Medicine, Medical University of South Carolina, Charleston, SC, USA

17 \* Drs Kyryachenko, Georges, and Yu contributed equally to this work as joint first authors.

18

19 **Short title:** Regulatory profiles of mitral valves

20

21 Corresponding author: Nabila Bouatia-Naji, email: [nabila.bouatia-naji@inserm.fr](mailto:nabila.bouatia-naji@inserm.fr), address: Paris

22 Cardiovascular Research Center Inserm U970, 56 rue Leblanc, F-75015 Paris, France

23

24 **Total word count:** 8,141

25 **Subject terms:** Valvular Heart Disease, Functional Genomics, Genetics, Etiology

26

27 **ABSTRACT**

28 **Rationale:** Mitral valve prolapse (MVP) is a common valve disease that leads to mitral  
29 insufficiency, heart failure and sudden death. The identification of risk loci provided insight into  
30 its genetic architecture, although the causal variants and target genes need to be fully  
31 characterized.

32 **Objective:** To establish the chromatin accessibility profiles and gene regulation specificities of  
33 human mitral valve and identify functional variants and target genes at MVP loci.

34 **Methods and Results:** We mapped the open chromatin accessible regions in nuclei from 11  
35 human mitral valves by an assay for transposase-accessible chromatin with high-throughput  
36 sequencing (ATAC-Seq). Compared to the heart tissue and cardiac fibroblasts, we found that  
37 mitral valve-specific ATAC-Seq peaks were enriched near genes involved in extracellular matrix  
38 organization, chondrocyte differentiation, and connective tissue development. The most enriched  
39 motif in mitral valve-specific open chromatin peaks was for the nuclear factor of activated T  
40 cells (NFATC) family of transcription factors, involved in valve endocardial and interstitial cells  
41 formation. We also found that MVP-associated variants ( $p < 10^{-5}$ ) observed in the current MVP  
42 GWAS were significantly enriched ( $p < 0.05$ ) in mitral valve open chromatin peaks. Integration of  
43 the ATAC-Seq data with GWAS loci, extensive functional annotation, and gene reporter assay  
44 revealed plausible causal variants at two risk loci: rs6723013 at the *IGFBP5/TNSI* locus and  
45 rs2641440 at the *SMG6/SRR* locus. Circular chromosome conformation capture followed by  
46 high-throughput sequencing provided evidence for several target genes, including *SRR*, *HIC1*,  
47 and *DPH1* at the *SMG6/SRR* locus and further supported *TNSI* as the most likely target gene on  
48 Chr2.

49 **Conclusions:** Here we describe unprecedented genome-wide open chromatin profiles from  
50 human mitral valves that indicates specific gene regulation profiles, compared to the heart. We  
51 also report *in vitro* functional evidence for potential causal variants and target genes at MVP risk  
52 loci involving established and new biological mechanisms relevant to mitral valve disease.

53 **Key Words:** Mitral valve prolapse, functional annotation at GWAS loci, ATAC-Seq, 4C-Seq.

54

## 55 **Introduction**

56 Mitral valve presents specific cellular and tissue organization, compared to the heart and the  
57 vessels. The mature mitral valve is mainly composed of valvular interstitial cells (VICs), and is  
58 covered by a layer of valvular endothelial cells (VECs). These cells communicate via paracrine  
59 signaling, and altered or damaged signaling within the VECs can lead to pathological changes in  
60 underlying VICs.<sup>1,2,3</sup> VICs are relatively quiescent non-contractile fibroblast-like cells that  
61 contribute to homeostasis of extracellular matrix (ECM).<sup>4</sup> During valve development or under  
62 mechanical stress, VICs change phenotype and become activated myofibroblast-like cells that  
63 produce matrix metalloproteinases and inflammatory cytokines, which increase matrix  
64 production and remodel the ECM.<sup>5,6,7</sup> Under excessive constant stress or TGF- $\beta$  stimulation, this  
65 process leads to myxomatous degeneration of the valve causing mitral valve prolapse (MVP), a  
66 common valve disease. MVP affects nearly one in 40 adults and predisposes to mitral  
67 regurgitation, arrhythmias, and sudden cardiac death.<sup>8,9,10</sup> Mitral regurgitation is the second most  
68 frequent indication for valve surgery, where valve reparation and replacement represent an  
69 important public health cost.<sup>11</sup> The causes of MVP development and evolution are still poorly  
70 understood.

71 In a previous genome-wide association study (GWAS) for MVP, we identified six validated  
72 genetic risk loci, all located in intergenic or intronic noncoding regions.<sup>12</sup> Associated variants are  
73 potentially located near regulatory elements that may be involved in the adjustment of target  
74 genes expression, specific to mitral valve. In the context of GWAS association signals, typically  
75 including large number of highly correlated genetic variants, the identification of potential causal  
76 variants and target genes requires the annotation of loci with epigenomic data generated from  
77 disease-relevant tissues.<sup>13,14</sup> However, the most commonly used techniques, such as DNase-seq

78 or histone-ChIP, require relatively high amount of cells, which excludes many tissues, including  
79 heart valve, from such analyses. On the other hand, expression quantitative trait loci (eQTL) in  
80 disease-relevant tissues are widely used to narrow down causal variants and potential target  
81 genes at GWAS loci,<sup>15</sup> but such datasets are not available for the mitral valve.

82 Here we aimed to fill in the existing gap in functional annotation datasets for human mitral valve  
83 using the assay for transposase accessible chromatin using high-throughput sequencing (ATAC-  
84 Seq) approach, a genomic technique that provides a high-resolution map of open chromatin from  
85 samples with low cell content, as is the case of mitral valve tissue. Using this genomic annotation  
86 technique, we provide valuable information about active gene expression and main regulatory  
87 elements within human mitral valve cells. As a complementary approach, and in the absence of  
88 eQTL datasets for mitral valve, we performed circular chromatin conformation capture analyzed  
89 by high-throughput sequencing (4C-Seq) to provide evidence for physical proximity between  
90 MVP-associated variants and promoters as an indication of possible regulatory event between  
91 genetic variants and target genes.<sup>16,17</sup> Finally, we provide two successful examples of the  
92 application of the genomic annotation, which we have generated, combined with chromatin  
93 architecture and gene reporter enhancer assay *in vitro* to propose candidate genetic variants for  
94 causality and their potential target genes at MVP GWAS loci.

95

## 96 **Materials and Methods**

### 97 **Sample acquisition and patient consent**

98 Mitral valve tissue was acquired at University Medical Center Göttingen, Georg-August  
99 University of Göttingen, Germany with written and informed consent through Institutional  
100 Review Board (IRB) protocol N° 4/11/18. Freshly obtained mitral valve tissue from 11 patients  
101 who underwent mitral valve replacement surgery (Supplementary Table S1) was snap frozen in  
102 liquid nitrogen and stored at -80°C.

103

### 104 **Cell culture**

105 Primary adult human dermal fibroblasts (HDF) (ATCC, Manassas, VA) and human cardiac  
106 fibroblasts (HCF) (Cell Applications, San Diego, CA) cells were purchased at passage 2 from  
107 LGC Standards, France and Tebu-bio, France respectively, and cultured in 5% CO<sub>2</sub> in a 37°C  
108 incubator. HDF were maintained in fibroblast basal medium (ATCC, Manassas, VA) with  
109 fibroblast growth kit-low serum (ATCC, Manassas, VA), and HCF were maintained in HCF  
110 growth medium (Cell Applications, San Diego, CA) according to the manufactures' instructions.

111

### 112 **Isolation of nuclei from frozen mitral valves for ATAC-Seq**

113 Frozen mitral valve tissues were mechanically dissociated in liquid nitrogen using mortar and  
114 pestle. Grinded tissue was transferred into 15 ml Falcon tubes containing 5 ml of cold  
115 homogenization buffer (HB): 10 mM Tris-HCl pH 7.6, 10 mM NaCl, 3 mM MgCl<sub>2</sub>, 0.1% NP40,  
116 0.1% Tween-20, 0.01% Digitonin, 250mM Sucrose, and EDTA-free complete protease inhibitors  
117 (Roche, Pleasanton, CA). The homogenate was filtered through 400 µm cell strainer

118 (pluriStrainer, Leipzig, Germany). Then, the isolation of nuclei was performed as described<sup>18</sup>  
119 with modifications. Specifically, after Dounce homogenization, the tissue homogenate was  
120 pelleted at 500g for 10 minutes at 4°C. Tissue homogenate (700-800 µl) was transferred to a 14  
121 ml round bottom tube (Greiner Bio-One, Frickenhausen, Germany) and mixed with an equal  
122 volume of 50% iodixanol in HB to obtain a final 25% iodixanol. 1200 µl of 30% iodixanol in HB  
123 was layered underneath the 25% mixture, and then 1200 µl of 40% iodixanol in HB was layered  
124 below the 30% iodixanol. Nuclei were enriched at 3,000g for 20 minutes at 4°C in a swinging-  
125 bucket centrifuge. Nuclei that accumulated at the 30%/40% interface were collected into a 1.5 ml  
126 Lo-Bind Eppendorf tube, stained with Trypan Blue, and manually counted under microscope.

127

#### 128 **Library preparation for ATAC-Seq**

129 HDF and HCF cells at passage 5 were trypsinized, counted using a Nucleocounter NC-100  
130 (Chemometec, Allerød, Denmark), and 50,000 cells were collected for each experiment. Isolated  
131 from mitral valves nuclei were transferred into a 1.5 ml Lo-Bind Eppendorf tube containing 1 ml  
132 ATAC-resuspension buffer with 0.1% Tween-20 and pelleted at 500 g for 10 minutes at 4°C.<sup>18</sup>  
133 Depending on the number of nuclei (30,000-100,000) that were obtain, the transposition reaction  
134 was scaled up or down. The transposition reaction was performed as described in the Omni-  
135 ATAC protocol.<sup>18</sup> Then, the transposition reaction was purified with MinElute PCR Purification  
136 Kit (QIAGEN, Hilden, Germany). Library amplification was performed as described  
137 previously.<sup>19</sup> Amplified DNA was purified using Agencourt AMPure XP beads (Beckman  
138 Coulter, Brea, CA), according to manufacturer's instructions.

139



## 140 **Sequencing of ATAC-Seq libraries and peak calling**

141 ATAC-seq libraries were sequenced using 42 paired-end sequencing cycles on an Illumina  
142 NextSeq500 system at the high throughput sequencing core facility of Institute for Integrative  
143 Biology of the Cell (CNRS, France). Reads were demultiplexed using bcl2fastq2-2.18.12, and 31  
144 to 95 million reads (fragments) were obtained per sample. Adapter sequences were trimmed  
145 using CutAdapt v1.15. For heart samples from ENCODE, raw reads from ATAC-Seq  
146 experiments on human heart left ventricle (ENCSR117PYB, ENCSR851EBF) and human right  
147 atrium auricular region (ENCSR062SVK) were downloaded from ENCODE webservice. Read  
148 length was adjusted to 42bp using Cutadapt. Further analyses were performed on the Galaxy  
149 webservice.<sup>20</sup> Reads were mapped on GRCh38 (hg38) genome using Bowtie2 v2.3.4.3 with  
150 default settings, except reads could be paired at up to 2kb distance. Aligned reads were filtered  
151 using BAM filter v0.5.9, keeping only mapped, properly paired reads, and removing secondary  
152 alignment and PCR duplicate reads as well as blacklisted regions.<sup>21</sup> ATAC peaks were called  
153 using MACS2 callpeak v2.1.1.20160309.6 with default settings. Binary read density files  
154 (bigwig) were created using bamCoverage v3.3.0.0.0, normalized on hg38 genome. BEDTool  
155 AnnotateBed v2.29.0 was used to compare peak files.

156

## 157 **Analysis of chromatin accessibility profiles**

158 To perform sample correlation and principal component analysis, a common list of enriched  
159 regions was generated using bedtools multiple intersect (Galaxy Version 2.29.0) in “cluster”  
160 mode, and average read coverage on these regions was computed using deepTools  
161 multiBamsummary (Galaxy Version 3.3.2.0.0). deepTools plotCoverage and plotPCA functions  
162 were used to calculate Pearson correlation between samples and Principal Component Analysis,

163 respectively. Global peak annotation was performed using ChIPSeeker v1.22.0.<sup>22</sup> We used  
164 Diffbind (Galaxy Version 2.10.0) to detect differentially accessible regions between heart and  
165 mitral valve samples.<sup>23</sup> clusterProfiler v3.14.0 was used to annotate genes at proximity of  
166 ATAC-Seq peaks and identify enriched gene ontology terms.<sup>24</sup> Identified GOBP terms were  
167 clustered using REVIGO webserver (<http://revigo.irb.hr/>), with “medium” settings.<sup>25</sup> We  
168 analyzed ATAC-seq peaks for enrichment in putative TF binding motifs using MEME-ChIP tool  
169 on MEME webserver (<http://meme-suite.org/>)<sup>26</sup> set with HOCOMOCO Human v11 motif  
170 database. We used Integrated Genome Browser (IGB) to visualize read density profiles and peak  
171 positions in the context of human genome.<sup>27</sup>

172

### 173 **Prioritization of functional SNPs using annotation tools**

174 Analysis of SNP enrichment among ATAC-Seq peaks was performed using GREGOR.<sup>28</sup> The  
175 sentinel SNPs from loci associated with  $p$ -value  $< 10^{-5}$  were used as reference for MVP-  
176 associated SNPs. We included in the analysis SNPs in high LD ( $r^2 < 0.7$ ) in European samples  
177 from 1000 Genomes. To use homogenous peak sets and mitigate the difference in signal-to-noise  
178 ratio between samples, 500bp windows centered on peak summits were used for this analysis.  
179 Next, to prioritize the most possible functional SNPs at each of the risk loci, we annotated each  
180 SNP with overlapping mitral valve ATAC-Seq peaks (narrowpeak from MCAS2 output + 100bp  
181 on each side), presence of overlapping H3K27ac histone mark from heart left ventricle, heart  
182 right atrium, ascending aorta or primary fibroblasts (peaks from ENCODE datasets:  
183 ENCF052BXS, ENCF172RFM, ENCF208DZK, ENCF222SST, ENCF222WPT,  
184 ENCF283CXG, ENCF332RJQ, ENCF385NNX, ENCF401EEA, ENCF491RWJ,

185 ENCF617BNF, ENCF670ZUM, ENCF686LUV, ENCF824SPW, ENCF946SRJ,  
186 ENCF964UAX, and ENCF984MJS) and RegulomeDB score.<sup>29</sup>

187

### 188 **Conditional analyses using GWAS data at *IGFBP5/TNSI* and *SMG6/SRR* loci**

189 Using genotype data from our previous study<sup>12</sup>, we performed an updated association analysis on  
190 chromosome 2 and chromosome 17 using newly imputed SNPs obtained from the HRC<sup>30</sup> as  
191 imputation reference panel through Michigan imputation server<sup>31</sup>. We used results from our  
192 GWAS meta-analysis as described previously.<sup>12</sup> We used the GCTA-COJO function to perform  
193 conditional analyses to identify secondary or causal signals on loci.<sup>32</sup> The COJO analysis used  
194 the MVP-France case control study as reference panel to calculate linkage disequilibrium (LD)  
195 between SNPs. To avoid collinearity issues, SNPs in high LD ( $r^2 > 0.9$ ) with the tested SNP were  
196 excluded before analyses.

197

### 198 **Circular chromatin conformation capture followed by high-throughput sequencing (4C- 199 Seq)**

200 The 4C template was prepared as previously described.<sup>33</sup> In summary, 10 million of HDF were  
201 fixed in 2% formaldehyde, and then the cells were lysed to isolate nuclei. The chromatin was  
202 digested *in situ* with the four-base cutter MboI (New England Biolabs, Ipswich, MA) for 16  
203 hours at 37°C followed by *in situ* ligation with T4 ligase (Thermo Fisher Scientific, Waltham,  
204 MA). Chromatin was decross-linked at 65°C overnight, followed by a second digestion with the  
205 four-base cutter NlaIII (New England Biolabs, Ipswich, MA). Digested fragments were diluted  
206 and self-ligated using T4 ligase to generate circular chromatin conformation capture (4C) library.

207 The efficiency of each digestion and ligation step was validated on agarose gels. Viewpoints  
208 were selected on the basis of the MVP susceptibility loci found in the GWAS.<sup>12</sup> To study the  
209 chromatin interactions of MVP-associated susceptibility loci with 4C, primers (Supplementary  
210 Table S2) were designed for each viewpoint as described previously.<sup>33</sup> 4C libraries were  
211 sequenced using single-end 75bp reads on an Illumina NextSeq500 system at the high  
212 throughput sequencing core facility of Institute for Integrative Biology of the Cell (CNRS,  
213 France). The raw sequencing reads were demultiplexed on the basis of viewpoint-specific primer  
214 sequences. Reads were trimmed of sequences preceding MboI (GATC) site on 5' end and  
215 following NlaIII site (CATG) on 3'end (if site was present in the read) using Cutadapt (Galaxy  
216 Version 1.16.6) on Galaxy webserver.<sup>20</sup> Trimmed reads were mapped on GRCH37 (hg19, for  
217 r3Cseq package) and GRCH38 (hg38, for visualization) genomes using Bowtie2 v2.3.4.3 with  
218 default settings. Unmapped reads and secondary alignments were filtered out using Filter bam  
219 v0.5.9. Kept reads were processed using the R-package r3Cseq to detect significant  
220 interactions.<sup>34</sup> All 4C-seq images were generated using default parameters of the pipeline.

221

## 222 **Vector construction, cell transfection, and dual-luciferase reporter gene assay**

223 Details about primers and vector construction are presented in the supplementary appendix and  
224 in Supplementary Table S3. The constructed vector that contained the test SNP (90 ng for 96-  
225 well plate) and internal control plasmid pRL-TK (Promega, Madison, WI) (10 ng for 96-well  
226 plate) were co-transfected into HDF. The cells were plated at 4000 cells/well into a 96-well  
227 white plate 24 hours before transfection. The cells were transfected with a TransfeX transfection  
228 reagent (ATCC, Manassas, VA) according to the manufacturer's instructions. Dual-luciferase  
229 reporter gene assays were performed after 48h post-transfection. Mithras LB 940 instrument

230 (Berthold Technologies, Bad Wildbad, Germany) was used to measure the luciferase activity  
231 with the Dual-Luciferase Reporter Assay System (Promega, Madison, WI). All experiments were  
232 performed according to the instructions recommended by the manufacturer. The luciferase  
233 activity data were obtained from at least eight replicate wells, and the experiments were repeated  
234 3 times. Two-tailed Student's t-test was used to compare if the difference was significant and the  
235 significance threshold was set at  $P < 0.05$ .

236

237

238

## 239 **Results**

### 240 **Mapping the chromatin accessibility profiles of human mitral valve tissue**

241 We sought to get insight into the regulatory features of valve tissue by determining the chromatin  
242 accessibility profiles of surgically removed mitral valves using ATAC-Seq. We obtained  
243 between 55 and 95 million paired-end reads from the generated ATAC-Seq libraries of isolated  
244 nuclei from 11 valves. Peak calling ranged between 7,165 and 74,837 peaks, with five samples  
245 having at least 30,000 peaks (Figure 1A). We calculated Spearman correlation between samples  
246 to assess the variability in our experiment. We identified two main clusters: cluster A formed by  
247 the five samples where we obtained at least 30,000 peaks, and Cluster B formed by the six  
248 remaining samples, although these were relatively less correlated, indicating more inter-sample  
249 heterogeneity (Figure 1B). The visual examination of read density profiles showed that samples  
250 from Cluster A represented optimal quality ATAC-Seq data (Figure 1C). We therefore selected  
251 Cluster A samples (MV1671, MV1700, MV1772, MV1830, and MV1846) for further analyses.

252 **Comparison of chromatin accessibility profiles between mitral valve, heart tissues, and**  
253 **fibroblast cells**

254 To determine whether mitral valve ATAC-Seq allows the identification of valve specific  
255 regulatory elements, we compared our data to primary cultures of fibroblasts and heart tissue.  
256 We determined chromatin accessibility in human dermal fibroblasts (HDF, two samples) and  
257 human cardiac fibroblasts (HCF, one sample), and reanalyzed through our pipeline ATAC-Seq  
258 experiments on heart left ventricle (Heart LV, two samples) and heart right atrium auricular  
259 region (Heart RAAR, one sample) from ENCODE. We obtained more than 130,000 peaks in all  
260 three fibroblasts samples, and 20,000 to 40,000 peaks from heart tissue (Figure 2A). We then  
261 annotated the genomic localization of ATAC-Seq peaks obtained in all samples. A large  
262 proportion of peaks observed in mitral valves were located in promoter regions (25 to 50%,  
263 according to samples, Figure 2B). Overall, 75 to 80% of peaks were located in the promoter or  
264 transcribed regions of genes, corresponding to usual localization of regulatory elements in the  
265 human genome identified by ATAC-Seq.<sup>35</sup>

266 We calculated Spearman correlation between all samples and identified three main clusters  
267 corresponding to mitral valve, heart samples, and primary cultured fibroblasts (Figure 2C). Heart  
268 samples from ENCODE clustered closer to mitral valve than to primary fibroblasts. Similarly,  
269 principal component analyses showed that tissue samples clustered together and separately from  
270 fibroblasts along the first principal component, which explains about 90% of the observed  
271 variance, whereas heart and mitral valve samples were separated by second principal component,  
272 accounting for about 5% of the total variance (Figure 2D).

273

## 274 **Chromatin accessibility profiles present regulatory features specific to mitral valve**

275 To detect mitral valve-specific regulatory elements, we compared mitral valve samples to heart  
276 tissue samples. We identified 9758 peaks specifically enriched in the heart or mitral valve  
277 (FDR $\leq$ 0.05, Figure 3A). To assess the global gene function controlled by these putative  
278 regulatory regions, we considered genes for which the transcription starting site (TSS) was  
279 located at 10kb or less distance from the enriched peaks (promoters or proximal regulatory  
280 elements), and we performed their functional annotation using Gene Ontology Biological  
281 Process (GOBP) terms. Genes at proximity of heart-specific ATAC-Seq peaks present strong  
282 enrichment for genes involved in heart contraction (p=6 $\times$ 10<sup>-19</sup>), muscle cell differentiation  
283 (p=3 $\times$ 10<sup>-16</sup>), and other pathways related to heart function (Figure 3B, Supplementary Table 1 and  
284 2). Mitral valve-specific ATAC-Seq peaks were strongly enriched at proximity of genes involved  
285 in different biological pathways including ECM organization (p=5 $\times$ 10<sup>-15</sup>), chondrocyte  
286 differentiation (p=6 $\times$ 10<sup>-11</sup>), and terms associated to connective tissue development (Figure 3C,  
287 Supplementary Tables 3 and 4). We also note among top enriched terms those related to cell-cell  
288 adhesion and communication (e.g actin filament organization and the ephrin receptor signaling  
289 pathway) (Supplementary Tables 3 and 4).

290 Results of the enrichment analyses for transcription factor motifs also differ between heart and  
291 mitral valve. The most enriched motifs among heart-specific peaks were motifs for transcription  
292 factors involved in heart development and function<sup>36,37,38</sup>, mainly the Kruppel-like factor (KLF)  
293 and myocyte enhancer factor-2 (MEF2) families (Figure 3D). In the mitral valve-specific peaks,  
294 the top enriched motif corresponds to transcription factors of the nuclear factor of activated T  
295 cells (NFATC) family (Figure 3E).

296 **Mitral valve specific open chromatin peaks are enriched for MVP associated loci**

297 Mitral valve ATAC-Seq data provide potential regulatory elements that may participate to the  
298 pathogenesis of MVP. To investigate further this idea, we tested the enrichment for associated  
299 SNPs from existing MVP GWAS results among different ATAC-Seq datasets.<sup>12</sup> We used the  
300 Genomic Regulatory Elements and GWAS Overlap algorithm (GREGOR)<sup>28</sup> that compares the  
301 number of trait-associated SNPs overlapping predefined genomic regions (here, ATAC-Seq  
302 peaks) with randomized SNP matched by regions (1Mb window) and frequency. Figure 4A  
303 shows that MVP-associated SNPs ( $p < 10^{-5}$ ) were significantly enriched ( $p < 0.05$ ) in ATAC-Seq  
304 peaks from all mitral valve samples whereas significant enrichment was found for only one of  
305 the other samples (Heart LV-2). Maximal enrichment was seen for MV1830, for which ATAC-  
306 Seq peaks overlapped over 4 times more MVP-associated SNPs than expected ( $p=6 \times 10^{-6}$ , Figure  
307 4A). Comparatively, ATAC-Seq peaks from fibroblasts samples did not significantly overlap  
308 with MVP-associated SNPs, despite the fact that most peaks from mitral valves were also  
309 observed in fibroblast ATAC-Seq peaks.

310

311 **Identification of potential causal variants at MVP-associated loci**

312 Given the enrichment for regulatory elements near genes involved in myxomatous valve biology,  
313 we sought to use the mitral valve ATAC-Seq datasets to narrow down a list of potential causal  
314 SNPs at MVP-associated loci. We selected associated SNPs ( $p < 0.001$ ) from the six loci  
315 reaching genome-wide significance in our previous study<sup>12</sup> and filtered for colocalization with  
316 mitral valve ATAC-Seq peaks (Table 1). Between three and 20 SNPs were identified at each  
317 locus, representing a list of potential causal SNPs. We annotated these SNPs using RegulomeDB



318 scores from 1 (most likely to affect TF binding and expression of a target gene) to 6 (least  
319 likely), and for the presence of H3K27ac enhancer/promoter marks in heart tissue (left ventricle  
320 or right atrium), ascending aorta, and dermal fibroblasts (Table 1).

321 To assess the validity of our approach, we sought to confirm the potential of selected SNPs as  
322 causal for MVP association. At the *IGFBP5/TNSI* locus on Chr2, where we had observed the  
323 strongest association signal in the discovery GWAS meta-analysis,<sup>12</sup> only three SNPs overlapped  
324 ATAC-Seq peaks, and among them rs6723013 had the most significant association. Rs6723013  
325 directly overlapped an H3K27ac histone mark in the heart left ventricle tissue, indicating it may  
326 be a part of an active enhancer region (Table 1). To further verify the regulatory effect of this  
327 SNP, we cloned 696bp DNA surrounding rs6723013, containing either rs6723013 reference (T)  
328 or alternative allele (G), upstream of *firefly luciferase* gene in a reporter vector. We then  
329 transfected these constructs in HDF, in which the region appeared to be active, and we measured  
330 the expression of luciferase. Interestingly, we found that T allele of rs6723013 was associated  
331 with significantly higher expression levels of firefly luciferase (reporter gene) than the  
332 alternative G allele of SNP rs6723013 ( $p=0.006$ ), whereas the construct containing G allele did  
333 not differ significantly from a control construct containing 751bp DNA from an inactive region  
334 (Figure 4B). These results show that rs6723013 genotype affects the regulatory properties of this  
335 enhancer and support it as a causal variant. In support of this, the conditional analysis on  
336 rs6723013, caused the association signal to totally disappear and indicated that this variant to  
337 totally drive the association at this locus (Supplementary Table S4, Figure 4C-D), (Figure 4D).

338 We applied the same strategy to the *SMG6/SRR* locus on Chr17, which is also known as a risk  
339 locus for other cardiovascular traits, such as aortic root size and coronary artery disease.<sup>39,40,41</sup>  
340 Colocalization analysis showed that 21 SNPs directly overlap mitral valve ATAC-Seq peaks and

341 18 of these SNPs also overlap H3K27ac marks in at least one tissue, most of them in all the  
342 tested tissues. Among these SNPs, rs2641440 was ranked by RegulomeDB as the most likely  
343 regulatory SNP (RegulomeDB score=1f), and it belongs to a strongly active region in all assayed  
344 tissues (Table 1). We also selected rs9899330 for *in vitro* tests, given its RegulomeDB high score  
345 2b (Table 1), and low linkage disequilibrium with rs2641440 ( $r^2=0.21$ , CEU 1000 genomes),  
346 suggesting it may belong to a secondary association signal. We then tested the effect of  
347 rs2641440 and rs9899330 genotypes on the regulatory activity of the surrounding region in HDF.  
348 The vector with the alternative C allele for rs2641440 had significantly higher luciferase activity  
349 compared with the construct containing the reference G allele ( $p=0.0017$ ) (Supplementary Figure  
350 S1A). Both constructs that contained alternative or reference allele of rs9899330 significantly  
351 enhanced the activity of luciferase compared with the control construct, but had no allelic effect  
352 on the regulatory activity of surrounding region (Supplementary Figure S1B). Interestingly,  
353 conditional analyses both on rs2641440 and rs9899330 at *SMG6/SRR* locus (Supplementary  
354 Table S4) caused a decrease of the association signal (Supplementary Figure S1C-F), supporting  
355 the existence of two independent signals at this locus.

356

### 357 **Identification of potential target genes at MVP-associated loci**

358 To get further insight into the biology of MVP, we sought to determine potential target genes at  
359 each of the six confirmed MVP-associated loci<sup>12</sup>. First, we examined potential causal SNPs  
360 (Table 1) for eQTL association with genes in any human tissue using the Genotype-Tissue  
361 Expression (GTEx) portal (Table 2). Then, we performed circular chromatin conformation  
362 capture (4C) followed by high-throughput sequencing (4C-Seq) in human dermal fibroblasts to  
363 verify the potential target genes. We selected one to four viewpoints at each locus focusing on

364 potentially functional SNPs according to the functional annotation, or at the closest genomic  
365 regions where we could design primers. Then, we used r3Cseq package to determine fragments  
366 that were significantly enriched in the 4C-Seq library (Supplementary Figure S2-5). Genes were  
367 considered as potential target genes if their promoter was present within 5kb of an enriched  
368 fragment or of a potentially functional SNP (Table 2). Neither eQTL nor 4C-seq analyses  
369 showed statistically significant association with target genes at the *IGFBP5/TNS1* MVP-  
370 associated locus (Supplementary Figure S2A, B, Table 2). At the Chr3 MVP-associated locus,  
371 we found interactions between the viewpoint and the promoter region of *LMCD1* gene  
372 (Supplementary Figure S2C) and no evidence for long range regulation for the nearby *CAV3*,  
373 which is highly expressed in the heart, and rare mutations may cause long QT syndrome.<sup>42,43</sup> Our  
374 analyses also pointed out potential target genes at the Chr14, Chr21, and Chr22 MVP-associated  
375 loci, and further studies should explore their role in the MVP disease (Table 2, Supplementary  
376 Figure S3 and S5). On Chr17, variants at the *SMG6/SRR* locus had eQTL association with many  
377 potential target genes, including *SMG6*, *SRR*, *TSR1*, *SGSM2*, *HIC1*, and *DPH1* (Table 2). 4C-seq  
378 analyses from rs9899330 viewpoint showed significant interactions with promoters of *HIC1* and  
379 *DPH1*, which are located upstream of *SMG6*. (Figure 5, Supplementary Figure S4D).  
380 Interestingly, we detected numerous significant interactions between the selected viewpoints and  
381 the open chromatin regions within *SMG6/SRR* locus (Figure 5, Supplementary Figure S4). In  
382 particular, all viewpoints interacted with the same region containing strong enhancer signals  
383 close to a *SMG6* alternative promoter. These results suggest that active regions at this locus  
384 strongly interact together, and support the presence of multiple causal SNPs participating to the  
385 associations targeting multiple genes at this locus.

386

387

## 388 **Discussion**

389 In this study, we used epigenomic approaches to unravel the regulatory profile of human mitral  
390 valve tissue and leveraged this data to investigate functional variants and target genes at MVP-  
391 associated loci. We showed that mitral valves genome-wide open chromatin profiles are distinct  
392 from those of the cardiac tissue and fibroblasts, and are enriched near genes that are highly  
393 relevant and specific to the development of the valve and to the myxomatous process.  
394 Combining *in vitro* enhancer activity and chromatin tri-dimensional architecture, we were able to  
395 identify functional variants at the *IGFBP5/TNS1* and *SMG6/SRR* loci and narrow down the list of  
396 target genes at several MVP confirmed loci.

397 Our data support that open chromatin mapping of diseased mitral valves provides a useful  
398 resource on cell differentiation and regulation of the myxomatous process. We found that  
399 ATAC-Seq peaks were highly enriched for genes relevant to valve biology and disease, such as  
400 ECM and connective tissue development and cytoskeleton organization, including actin filament  
401 and cell adhesion. Of particular interest are the open chromatin peaks near genes related to the  
402 ephrin receptor signaling pathway, an important family of transmembrane tyrosine kinase  
403 receptors that ensure short cell-cell communication. This pathway is involved in the regulation of  
404 epithelial-to-mesenchymal transformation during heart valve morphogenesis, and *Efnal*  
405 knockout mice exhibit the thickening of both aortic and mitral valves.<sup>44</sup> Another relevant process  
406 is chondrogenic differentiation, which is part of the valve myxomatous degeneration process of  
407 VICs.<sup>45</sup> We found the NFATC family of transcription factors to be the most enriched motif in  
408 mitral valve-specific open chromatin regions. NFATC1, in particular, is known to be a key factor

409 in heart valve and VICs development and its regulation may play a role in myxomatous  
410 degeneration.<sup>46,47,48</sup> NFATC1 is also expressed in adult human pulmonary VECs, and VEGF-  
411 induced NFATC1 activation can participate in the valve maintenance by increasing proliferation  
412 of VECs.<sup>49</sup> A study reported microarray gene expression to be increased for NFATC2 and  
413 NFATC4 in myxomatous mitral valves compared to normal valves.<sup>50</sup> Our results encourage  
414 future studies to understand the specific role of NFATCs in the establishment of MVP.

415 Our study shows that MVP-associated SNPs are significantly enriched among identified mitral  
416 valve open chromatin peaks, but not among regions accessible in dermal or cardiac fibroblasts.  
417 Despite the fibroblast-like phenotype of VICs and VECs, our results are in favor of open  
418 chromatin and active regulation in mitral valve tissue to significantly differ from the one  
419 observed in cultured fibroblasts derived from the skin or the heart.

420 Our approach to fine-map GWAS loci using chromatin accessibility data derived from mitral  
421 valve tissue, combined with the visualization of long-range genomic interaction using 4C-Seq  
422 method, allowed us to identify potential causal variants and to narrow down the list of target  
423 genes at risk loci, especially on chromosomes 2 and 17. At the *IGFBP5/TNSI* MVP-associated  
424 locus we identified rs6723013 as a functional enhancer *in vitro* and demonstrated regulatory  
425 allelic effect. Presence of the minor T allele (T=0.24, frequency in TOPMed panel) can modulate  
426 the expression of potential target genes by altering transcription factor binding onto DNA.  
427 Several TFs, such as *OVOL2* and *NFE2L1*, are predicted to bind more to the major G allele.  
428 *OVOL2* suppresses epithelial-to-mesenchymal transition and thus maintains epithelial lineages,  
429 and *NFE2L1* regulates expression of target genes in response to various stresses. Further studies  
430 are needed to explore their involvement in gene regulation by this enhancer region. Potential  
431 target genes at this locus were *IGFBP5*, *IGFBP2*, and *TNPI1* that are located upstream from the

432 signal, and *DIRC1* and *TNSI* located downstream from the signal. According to the chromatin  
433 organization observed from our 4C-Seq data, *IGFBP2*, *IGFBP5*, and *TNSI* were all part of the  
434 same TAD, which argues for high probability of contact between these genes promoters and the  
435 enhancer containing the functional variant. *IGFBP2* and *IGFBP5* are two members of the insulin  
436 growth factor binding protein family. *Igfbp5* is expressed in the developing mouse heart,<sup>51</sup> and  
437 differentially expressed in VECs during postnatal ECM remodeling and leaflet morphogenesis in  
438 P7 and P30 murine valves.<sup>52</sup> However, we have previously shown the absence of atrioventricular  
439 regurgitation properties in zebrafish knockdown experiments of *igfbp2* and *igfbp5* fish  
440 orthologs.<sup>12</sup> In the same study, significant atrioventricular regurgitation was found in zebrafish  
441 knockdown, and *Tns1*<sup>-/-</sup> mice exhibited myxomatous phenotype of mitral valves.<sup>12</sup> In light of  
442 these elements, we conclude that *TNSI* is the most plausible causal gene at the *IGFBP5/TNSI*  
443 locus through a potential long-range gene regulation mechanism, similar to previously described  
444 genomic organizations.<sup>53,54</sup>

445 The *SMG6/SRR* locus is an intriguing and genetically complex locus reported to be associated  
446 with several cardiovascular traits, including coronary artery disease.<sup>40,41</sup> Our updated association  
447 analysis, using a more dense imputed set of variants, provides several hundreds of variants in  
448 high LD to significantly associate with MVP at this locus. Filtering for the overlap with ATAC-  
449 Seq peaks in mitral valves and enhancer marks, prior to reporter assay experiments, provided  
450 evidence for enhancer capacity *in vitro* for rs2641440, with the G allelic variant (G=0.64,  
451 TOPMed) at risk for MVP. Nonetheless, the conditional analysis supported the presence of  
452 several secondary signals at this locus, and we cannot exclude additional functional effects from  
453 the untested SNPs. The *SMG6/SRR* locus is located in a gene-rich region that contains  
454 overlapping promoters. Our 4C-Seq showed that all four viewpoints that we tested as potential

455 enhancers were located within open chromatin in mitral valves, suggesting synergic regulation of  
456 several nearby genes.<sup>55</sup> We have previously excluded *SMG6* and *SGSM2* candidacy for causality  
457 at this locus as neither *smg6* nor *sgsm2* knockdown in zebrafish led to an abnormal cardiac  
458 phenotype.<sup>12</sup> Our chromatin interaction results now highlight new potential target genes,  
459 including HIC ZBTB transcriptional repressor 1 (*HIC1*), diphthamide biosynthesis 1 (*DPHI*),  
460 and serine racemase (*SRR*) genes, all expressed in heart tissues.<sup>56,57,58</sup> *HIC1* is a partner of TCF-  
461 4, and this complex attenuates Wnt/ $\beta$ -catenin signaling, an important mechanism for heart valve  
462 development and myxomatous degeneration.<sup>59,45</sup> On the other hand, patients with mutations in  
463 *DPHI* present heart abnormalities, including ventricular septal defect and aortic stenosis.<sup>60</sup>  
464 Finally, several associated variants are located at the promoter of *SRR*, which catalyzes the  
465 synthesis of D-serine from L-serine, and among its related pathways is calcium signaling.<sup>61</sup>

466

467 Our work presents several limitations. First, it is the absence of non-pathogenic valves as  
468 controls, which limited direct comparison of the regulatory profiles between healthy and  
469 myxomatous valves. Second, open chromatin profiles obtained from ATAC-seq methods provide  
470 indirect assessment of transcriptional activity. Direct assessment of transcription using RNA-Seq  
471 would be useful to determine the specific regulatory features of mitral valves, although their poor  
472 cellular content represents a technical challenge. Third, enhancer activity tested *in vitro* in  
473 dermal fibroblasts may differ from *in vivo* native chromatin activity in VICs and VECs. Finally,  
474 our results are conditioned by the limited resolution of the 4C-Seq experiments, which do not  
475 allow refinement at gene-rich loci as the *SMG6/SGSM2*.

476

477 In conclusion, we provide for the first time mitral valve genome-wide chromatin accessibility  
478 profiles and demonstrate that this valuable data source to substantially contribute to deciphering  
479 MVP etiology. We show that MVP-associated variants are significantly and specifically enriched  
480 in open chromatin of myxomatous valves. Using *in vitro* functional validation, in combination  
481 with long range chromatin interaction experiments, we provide evidence for causal SNPs at two  
482 MVP-associated loci and several target genes of high relevance to valve development and  
483 degenerative process.

484

#### 485 **ACKNOWLEDGMENTS**

486 The authors thank Ines Müller and Stefanie Kestel for excellent technical assistance.

487

#### 488 **FUNDING SOURCES**

489 This study was supported by a Ph.D. scholarship from the China Scholarship Council to MY, French  
490 Agency of Research (ANR-16-CE17-0015-02) to NB-N. AG, SK and NB-N are supported by a European  
491 Research Council grant (ERC-Stg-ROSALIND-716628). This work was supported by grants from the  
492 Deutsche Forschungsgemeinschaft (DFG) to NV (VO 1568/3-1, IRTG1816, and SFB1002  
493 project A13), from the Else-Kröner-Fresenius Foundation to NV (EKFS 2016\_A20) and from  
494 the German Center for Cardiovascular Research to NV (DZHK GOE MD3 and SE181). This  
495 work was supported in part by grants from the National Institutes of Health (GM103444 to RAN;  
496 R01HL131546, P20GM103444, and R01HL127692 to RAN; and American Heart Association  
497 (19TPA34850095 to RAN, 17CSA33590067 to RAN).

498

#### 499 **DISCLOSURES**

500 None

501



## 502 REFERENCES

- 503 1. Huk DJ, Austin BF, Horne TE, Hinton RB, Ray WC, Heistad DD, Lincoln J. Valve endothelial  
504 cell-derived tgfbeta1 signaling promotes nuclear localization of sox9 in interstitial cells  
505 associated with attenuated calcification. *Arteriosclerosis, thrombosis, and vascular biology*.  
506 2016;36:328-338
- 507 2. Menon V, Lincoln J. The genetic regulation of aortic valve development and calcific disease.  
508 *Frontiers in cardiovascular medicine*. 2018;5:162
- 509 3. Shapero K, Wylie-Sears J, Levine RA, Mayer JE, Jr., Bischoff J. Reciprocal interactions between  
510 mitral valve endothelial and interstitial cells reduce endothelial-to-mesenchymal transition and  
511 myofibroblastic activation. *Journal of molecular and cellular cardiology*. 2015;80:175-185
- 512 4. Hinton RB, Yutzey KE. Heart valve structure and function in development and disease. *Annual*  
513 *review of physiology*. 2011;73:29-46
- 514 5. Rabkin-Aikawa E, Farber M, Aikawa M, Schoen FJ. Dynamic and reversible changes of  
515 interstitial cell phenotype during remodeling of cardiac valves. *The Journal of heart valve*  
516 *disease*. 2004;13:841-847
- 517 6. Levine RA, Hagege AA, Judge DP, et al. Mitral valve disease--morphology and mechanisms.  
518 *Nature reviews. Cardiology*. 2015;12:689-710
- 519 7. Hjortnaes J, Camci-Unal G, Hutcheson JD, Jung SM, Schoen FJ, Kluin J, Aikawa E,  
520 Khademhosseini A. Directing valvular interstitial cell myofibroblast-like differentiation in a  
521 hybrid hydrogel platform. *Advanced healthcare materials*. 2015;4:121-130
- 522 8. Nishimura RA, McGoon MD. Perspectives on mitral-valve prolapse. *The New England journal of*  
523 *medicine*. 1999;341:48-50
- 524 9. Avierinos JF, Gersh BJ, Melton LJ, 3rd, Bailey KR, Shub C, Nishimura RA, Tajik AJ, Enriquez-  
525 Sarano M. Natural history of asymptomatic mitral valve prolapse in the community. *Circulation*.  
526 2002;106:1355-1361
- 527 10. Spartalis M, Tzatzaki E, Spartalis E, Athanasiou A, Moris D, Damaskos C, Garmpis N, Voudris  
528 V. Mitral valve prolapse: An underestimated cause of sudden cardiac death-a current review of  
529 the literature. *Journal of thoracic disease*. 2017;9:5390-5398
- 530 11. Iung B, Vahanian A. Epidemiology of acquired valvular heart disease. *The Canadian journal of*  
531 *cardiology*. 2014;30:962-970
- 532 12. Dina C, Bouatia-Naji N, Tucker N, et al. Genetic association analyses highlight biological  
533 pathways underlying mitral valve prolapse. *Nature genetics*. 2015;47:1206-1211
- 534 13. Bryois J, Garrett ME, Song L, et al. Evaluation of chromatin accessibility in prefrontal cortex of  
535 individuals with schizophrenia. *Nature communications*. 2018;9:3121
- 536 14. Kyono Y, Kitzman JO, Parker SCJ. Genomic annotation of disease-associated variants reveals  
537 shared functional contexts. *Diabetologia*. 2019;62:735-743
- 538 15. Fagny M, Paulson JN, Kuijjer ML, Sonawane AR, Chen CY, Lopes-Ramos CM, Glass K,  
539 Quackenbush J, Platig J. Exploring regulation in tissues with eqtl networks. *Proceedings of the*  
540 *National Academy of Sciences of the United States of America*. 2017;114:E7841-E7850
- 541 16. Simonis M, Klous P, Splinter E, Moshkin Y, Willemsen R, de Wit E, van Steensel B, de Laat W.  
542 Nuclear organization of active and inactive chromatin domains uncovered by chromosome  
543 conformation capture-on-chip (4c). *Nature genetics*. 2006;38:1348-1354
- 544 17. Vermunt MW, Zhang D, Blobel GA. The interdependence of gene-regulatory elements and the 3d  
545 genome. *The Journal of cell biology*. 2019;218:12-26
- 546 18. Corces MR, Trevino AE, Hamilton EG, et al. An improved atac-seq protocol reduces background  
547 and enables interrogation of frozen tissues. *Nature methods*. 2017;14:959-962
- 548 19. Buenrostro JD, Wu B, Chang HY, Greenleaf WJ. Atac-seq: A method for assaying chromatin  
549 accessibility genome-wide. *Current protocols in molecular biology*. 2015;109:21 29 21-21 29 29

- 550 20. Afgan E, Baker D, Batut B, et al. The galaxy platform for accessible, reproducible and  
551 collaborative biomedical analyses: 2018 update. *Nucleic acids research*. 2018;46:W537-W544
- 552 21. Amemiya HM, Kundaje A, Boyle AP. The encode blacklist: Identification of problematic regions  
553 of the genome. *Scientific reports*. 2019;9:9354
- 554 22. Yu G, Wang LG, He QY. Chipseeker: An r/bioconductor package for chip peak annotation,  
555 comparison and visualization. *Bioinformatics*. 2015;31:2382-2383
- 556 23. Ross-Innes CS, Stark R, Teschendorff AE, et al. Differential oestrogen receptor binding is  
557 associated with clinical outcome in breast cancer. *Nature*. 2012;481:389-393
- 558 24. Yu G, Wang LG, Han Y, He QY. Clusterprofiler: An r package for comparing biological themes  
559 among gene clusters. *Omics : a journal of integrative biology*. 2012;16:284-287
- 560 25. Supek F, Bosnjak M, Skunca N, Smuc T. Revigo summarizes and visualizes long lists of gene  
561 ontology terms. *PLoS one*. 2011;6:e21800
- 562 26. Machanick P, Bailey TL. Meme-chip: Motif analysis of large DNA datasets. *Bioinformatics*.  
563 2011;27:1696-1697
- 564 27. Freese NH, Norris DC, Loraine AE. Integrated genome browser: Visual analytics platform for  
565 genomics. *Bioinformatics*. 2016;32:2089-2095
- 566 28. Schmidt EM, Zhang J, Zhou W, Chen J, Mohlke KL, Chen YE, Willer CJ. Gregor: Evaluating  
567 global enrichment of trait-associated variants in epigenomic features using a systematic, data-  
568 driven approach. *Bioinformatics*. 2015;31:2601-2606
- 569 29. Boyle AP, Hong EL, Hariharan M, et al. Annotation of functional variation in personal genomes  
570 using regulomedb. *Genome research*. 2012;22:1790-1797
- 571 30. Vergara C, Parker MM, Franco L, Cho MH, Valencia-Duarte AV, Beaty TH, Duggal P.  
572 Genotype imputation performance of three reference panels using african ancestry individuals.  
573 *Human genetics*. 2018;137:281-292
- 574 31. Das S, Forer L, Schönherr S, et al. Next-generation genotype imputation service and methods.  
575 *Nature genetics*. 2016;48:1284-1287
- 576 32. Yang J, Ferreira T, Morris AP, et al. Conditional and joint multiple-snp analysis of gwas  
577 summary statistics identifies additional variants influencing complex traits. *Nature genetics*.  
578 2012;44:369-375, s361-363
- 579 33. Matelot M, Noordermeer D. Determination of high-resolution 3d chromatin organization using  
580 circular chromosome conformation capture (4c-seq). *Methods in molecular biology*.  
581 2016;1480:223-241
- 582 34. Thongjuea S, Stadhouders R, Grosveld FG, Soler E, Lenhard B. R3cseq: An r/bioconductor  
583 package for the discovery of long-range genomic interactions from chromosome conformation  
584 capture and next-generation sequencing data. *Nucleic acids research*. 2013;41:e132
- 585 35. Sheffield NC, Furey TS. Identifying and characterizing regulatory sequences in the human  
586 genome with chromatin accessibility assays. *Genes*. 2012;3:651-670
- 587 36. Nemer M, Horb ME. The klf family of transcriptional regulators in cardiomyocyte proliferation  
588 and differentiation. *Cell cycle*. 2007;6:117-121
- 589 37. Kelsey L, Flenniken AM, Qu D, et al. Enu-induced mutation in the DNA-binding domain of klf3  
590 reveals important roles for klf3 in cardiovascular development and function in mice. *PLoS*  
591 *genetics*. 2013;9:e1003612
- 592 38. Desjardins CA, Naya FJ. The function of the mef2 family of transcription factors in cardiac  
593 development, cardiogenomics, and direct reprogramming. *Journal of cardiovascular development*  
594 *and disease*. 2016;3
- 595 39. Vasan RS, Glazer NL, Felix JF, et al. Genetic variants associated with cardiac structure and  
596 function: A meta-analysis and replication of genome-wide association data. *Jama*. 2009;302:168-  
597 178
- 598 40. Schunkert H, König IR, Kathiresan S, et al. Large-scale association analysis identifies 13 new  
599 susceptibility loci for coronary artery disease. *Nature genetics*. 2011;43:333-338

- 600 41. Wild PS, Felix JF, Schillert A, et al. Large-scale genome-wide analysis identifies genetic variants  
601 associated with cardiac structure and function. *The Journal of clinical investigation*.  
602 2017;127:1798-1812
- 603 42. Tyan L, Foell JD, Vincent KP, et al. Long qt syndrome caveolin-3 mutations differentially  
604 modulate kv 4 and cav 1.2 channels to contribute to action potential prolongation. *The Journal of*  
605 *physiology*. 2019;597:1531-1551
- 606 43. Wallace E, Howard L, Liu M, O'Brien T, Ward D, Shen S, Prendiville T. Long qt syndrome:  
607 Genetics and future perspective. *Pediatric cardiology*. 2019;40:1419-1430
- 608 44. Frieden LA, Townsend TA, Vaught DB, Delaughter DM, Hwang Y, Barnett JV, Chen J.  
609 Regulation of heart valve morphogenesis by eph receptor ligand, ephrin-a1. *Developmental*  
610 *dynamics : an official publication of the American Association of Anatomists*. 2010;239:3226-  
611 3234
- 612 45. Fang M, Alfieri CM, Hulin A, Conway SJ, Yutzey KE. Loss of beta-catenin promotes  
613 chondrogenic differentiation of aortic valve interstitial cells. *Arteriosclerosis, thrombosis, and*  
614 *vascular biology*. 2014;34:2601-2608
- 615 46. Wu B, Wang Y, Lui W, Langworthy M, Tompkins KL, Hatzopoulos AK, Baldwin HS, Zhou B.  
616 Nfatc1 coordinates valve endocardial cell lineage development required for heart valve formation.  
617 *Circulation research*. 2011;109:183-192
- 618 47. Zanotti S, Canalis E. Notch suppresses nuclear factor of activated t cells (nfat) transactivation and  
619 nfatc1 expression in chondrocytes. *Endocrinology*. 2013;154:762-772
- 620 48. Gunawan F, Gentile A, Gauvrit S, Stainier DYR, Bensimon-Brito A. Nfatc1 promotes interstitial  
621 cell formation during cardiac valve development in zebrafish. *Circulation research*.  
622 2020;126:968-984
- 623 49. Johnson EN, Lee YM, Sander TL, Rabkin E, Schoen FJ, Kaushal S, Bischoff J. Nfatc1 mediates  
624 vascular endothelial growth factor-induced proliferation of human pulmonary valve endothelial  
625 cells. *The Journal of biological chemistry*. 2003;278:1686-1692
- 626 50. Greenhouse DG, Murphy A, Mignatti P, Zavadil J, Galloway AC, Balsam LB. Mitral valve  
627 prolapse is associated with altered extracellular matrix gene expression patterns. *Gene*.  
628 2016;586:56-61
- 629 51. Prall OW, Menon MK, Solloway MJ, et al. An nkx2-5/bmp2/smad1 negative feedback loop  
630 controls heart progenitor specification and proliferation. *Cell*. 2007;128:947-959
- 631 52. Hulin A, Hortells L, Gomez-Stallons MV, et al. Maturation of heart valve cell populations during  
632 postnatal remodeling. *Development*. 2019;146
- 633 53. Robson MI, Ringel AR, Mundlos S. Regulatory landscaping: How enhancer-promoter  
634 communication is sculpted in 3d. *Molecular cell*. 2019;74:1110-1122
- 635 54. Schoenfelder S, Fraser P. Long-range enhancer-promoter contacts in gene expression control.  
636 *Nature reviews. Genetics*. 2019;20:437-455
- 637 55. Fishilevich S, Nudel R, Rappaport N, et al. Genehancer: Genome-wide integration of enhancers  
638 and target genes in genecards. *Database : the journal of biological databases and curation*.  
639 2017;2017
- 640 56. Xia M, Liu Y, Figueroa DJ, et al. Characterization and localization of a human serine racemase.  
641 *Brain research. Molecular brain research*. 2004;125:96-104
- 642 57. Soliman H, Paylor B, Scott RW, et al. Pathogenic potential of hic1-expressing cardiac stromal  
643 progenitors. *Cell stem cell*. 2020;26:205-220 e208
- 644 58. Uhlen M, Fagerberg L, Hallstrom BM, et al. Proteomics. Tissue-based map of the human  
645 proteome. *Science*. 2015;347:1260419
- 646 59. Valenta T, Lukas J, Doubravska L, Fafilek B, Korinek V. Hic1 attenuates wnt signaling by  
647 recruitment of tcf-4 and beta-catenin to the nuclear bodies. *The EMBO journal*. 2006;25:2326-  
648 2337

- 649 60. Urreizti R, Mayer K, Evrony GD, et al. Dph1 syndrome: Two novel variants and structural and  
650 functional analyses of seven missense variants identified in syndromic patients. *European journal*  
651 *of human genetics : EJHG*. 2020;28:64-75
- 652 61. McGee MA, Abdel-Rahman AA. N-methyl-d-aspartate receptor signaling and function in  
653 cardiovascular tissues. *Journal of cardiovascular pharmacology*. 2016;68:97-105
- 654
- 655

656 **Table 1. Potential causal SNPs at the MVP-associated loci.** Overlaps with indicated  
657 epigenomic marks are indicated by grey cells. P values were reported for the association with  
658 MVP obtained in the discovery meta-analysis of GWAS<sup>12</sup> NA: not-available.

| Chr       | ID                   | P value              | ATAC-seq |        |        |        |        | RegulomeDB | H3K27ac mark |            |            |             |
|-----------|----------------------|----------------------|----------|--------|--------|--------|--------|------------|--------------|------------|------------|-------------|
|           |                      |                      | MV1700   | MV1772 | MV1830 | MV1846 | MV1671 |            | Heart LV     | Heart RAAR | Asc. Aorta | Fibroblasts |
| chr2      | rs17778091           | 7.1x10 <sup>-4</sup> | ■        | ■      |        | ■      | 5      | ■          |              |            |            |             |
|           | rs6723013            | 1.8x10 <sup>-8</sup> |          | ■      |        | ■      | 3a     | ■          |              |            |            |             |
|           | rs17778329           | 5.7x10 <sup>-4</sup> | ■        |        |        | ■      | 2b     |            | ■            | ■          |            |             |
| chr3      | rs165177             | 5.2x10 <sup>-5</sup> | ■        | ■      |        |        | 5      | ■          | ■            | ■          |            |             |
|           | rs164966             | 1.7x10 <sup>-5</sup> |          | ■      |        |        | 4      | ■          |              |            |            |             |
|           | rs165172             | 1.6x10 <sup>-5</sup> | ■        |        |        | ■      | 4      | ■          | ■            | ■          |            |             |
| chr14     | rs7155259            | 3.2x10 <sup>-4</sup> |          |        |        |        | 2b     |            |              |            |            |             |
|           | rs7156194            | 3.1x10 <sup>-4</sup> |          |        |        |        | 1b     |            |              |            |            |             |
|           | rs56201715           | 7.2x10 <sup>-4</sup> |          |        |        |        | 5      |            |              |            |            |             |
|           | rs61991204           | 3.2x10 <sup>-5</sup> | ■        |        |        |        | 5      |            |              |            |            |             |
|           | rs61991205           | 3.4x10 <sup>-5</sup> |          |        | ■      |        | 5      |            |              |            |            |             |
|           | rs17767410           | 3.4x10 <sup>-5</sup> | ■        |        | ■      |        | 5      |            |              |            |            |             |
|           | rs35609708           | 3.8x10 <sup>-5</sup> |          |        |        |        | 2b     |            |              |            |            |             |
| chr17     | rs2641440            | 5.0x10 <sup>-4</sup> | ■        |        | ■      |        | 1f     | ■          | ■            | ■          |            |             |
|           | rs2760734            | 1.5x10 <sup>-4</sup> |          | ■      | ■      |        | 4      | ■          | ■            | ■          |            |             |
|           | rs8068642            | 1.4x10 <sup>-4</sup> | ■        |        |        |        | 3a     | ■          | ■            | ■          |            |             |
|           | rs8082485            | 1.4x10 <sup>-4</sup> | ■        |        |        |        | 4      | ■          | ■            | ■          |            |             |
|           | rs898749             | 1.3x10 <sup>-4</sup> | ■        | ■      | ■      | ■      | 3a     | ■          | ■            | ■          |            |             |
|           | rs898748             | 1.3x10 <sup>-4</sup> |          |        | ■      | ■      | 3a     | ■          | ■            | ■          |            |             |
|           | rs7213715            | 1.7x10 <sup>-4</sup> | ■        |        |        |        | 4      | ■          | ■            | ■          |            |             |
|           | rs9895551            | 5.5x10 <sup>-6</sup> |          |        |        |        | 4      | ■          | ■            | ■          |            |             |
|           | chr17:2117652:D      | 6.9x10 <sup>-6</sup> |          |        |        |        | NA     | ■          | ■            | ■          |            |             |
|           | chr17:2117658:D      | 1.6x10 <sup>-6</sup> |          |        |        |        | NA     | ■          | ■            | ■          |            |             |
|           | rs11655813           | 3.4x10 <sup>-6</sup> | ■        | ■      | ■      |        | 4      | ■          | ■            | ■          |            |             |
|           | rs216172             | 3.3x10 <sup>-6</sup> | ■        | ■      |        | ■      | 4      | ■          | ■            | ■          |            |             |
|           | rs9899330            | 3.2x10 <sup>-6</sup> |          |        |        |        | 2b     | ■          | ■            | ■          |            |             |
|           | rs408067             | 9.2x10 <sup>-5</sup> | ■        | ■      | ■      |        | 4      | ■          | ■            | ■          |            |             |
|           | rs3744270            | 1.6x10 <sup>-4</sup> |          |        |        |        | 4      | ■          | ■            | ■          |            |             |
|           | rs12450028           | 1.1x10 <sup>-4</sup> |          |        | ■      |        | 2a     | ■          | ■            | ■          |            |             |
|           | rs113423156          | 7.6x10 <sup>-4</sup> |          |        | ■      |        | 3a     | ■          | ■            | ■          |            |             |
|           | chr17:2220814:D      | 1.6x10 <sup>-4</sup> |          |        | ■      |        | NA     | ■          | ■            | ■          |            |             |
|           | rs4477758            | 3.4x10 <sup>-4</sup> | ■        |        |        |        | 6      | ■          | ■            | ■          |            |             |
| rs3815469 | 6.7x10 <sup>-5</sup> |                      | ■        | ■      |        | 2b     | ■      | ■          | ■            |            |            |             |
| chr21     | rs112479655          | 5.8x10 <sup>-4</sup> |          |        |        |        | NA     |            |              |            |            |             |
|           | rs2255858            | 3.9x10 <sup>-5</sup> | ■        |        |        |        | 4      |            | ■            |            |            |             |
|           | rs75196102           | 3.8x10 <sup>-4</sup> |          | ■      | ■      | ■      | 4      | ■          | ■            | ■          |            |             |
|           | rs7280136            | 2.6x10 <sup>-5</sup> | ■        |        |        |        | 3a     | ■          | ■            | ■          |            |             |
| chr22     | rs1859136            | 4.9x10 <sup>-5</sup> |          |        |        |        | 4      |            |              |            |            |             |
|           | chr22:28206144:D     | 4.5x10 <sup>-8</sup> | ■        |        |        |        | NA     | ■          | ■            | ■          |            |             |
|           | rs6005631            | 3.2x10 <sup>-6</sup> | ■        | ■      |        |        | 4      | ■          | ■            | ■          |            |             |
|           | rs73164492           | 8.4x10 <sup>-8</sup> | ■        | ■      | ■      | ■      | 4      | ■          | ■            | ■          |            |             |
|           | rs11705555           | 4.4x10 <sup>-8</sup> | ■        | ■      | ■      | ■      | 2b     | ■          | ■            | ■          |            |             |
|           | rs13057169           | 8.4x10 <sup>-8</sup> | ■        | ■      | ■      | ■      | 4      | ■          | ■            | ■          |            |             |
| rs5997307 | 3.5x10 <sup>-6</sup> |                      | ■        |        |        | 4      | ■      | ■          | ■            |            |            |             |

659 **Table 2. Potential target genes at MVP-associated loci.**

| Chr   | Index SNP  | P value               | Potential causal SNPs | eQTL genes         | Tissue with highest eQTL association | Best eQTL SNP | Risk allele | eQTL p value         | Effect size | Topological association |
|-------|------------|-----------------------|-----------------------|--------------------|--------------------------------------|---------------|-------------|----------------------|-------------|-------------------------|
| Chr2  | rs12465515 | $3.1 \times 10^{-11}$ | 3                     |                    |                                      |               |             |                      |             |                         |
| Chr3  | rs171408   | $1.3 \times 10^{-11}$ | 3                     | <i>LMCD1</i>       | Heart - Atrial Appendage             | rs165177      | C           | $8 \times 10^{-7}$   | 0.27        | Y                       |
|       |            |                       |                       | <i>LMCD1-AS1</i>   | Pituitary                            | rs165172      | C           | $4 \times 10^{-6}$   | 0.47        | Y                       |
| Chr14 | rs17767392 | $2.3 \times 10^{-8}$  | 7                     | <i>SIPAIL1-AS1</i> | Esophagus - Muscularis               | rs17767410    | C           | $1 \times 10^{-12}$  | -0.43       | Y                       |
|       |            |                       |                       | <i>SIPAIL1</i>     | Esophagus - Muscularis               | rs17767410    | C           | $6 \times 10^{-12}$  | -0.27       | Y                       |
|       |            |                       |                       | <i>PCNX1</i>       | Skin - Sun Exposed (Lower leg)       | rs7155259     | C           | $1 \times 10^{-6}$   | 0.17        | N                       |
|       |            |                       |                       | <i>RP6-91H8.5</i>  | Brain - Cortex                       | rs7155259     | C           | $1 \times 10^{-5}$   | 0.36        | N                       |
|       |            |                       |                       | <i>COX16</i>       | Whole Blood                          | rs56201715    | G           | $9 \times 10^{-5}$   | 0.1         | N                       |
| Chr17 | rs216205   | $1.5 \times 10^{-8}$  | 20                    | <i>SRR</i>         | Muscle - Skeletal                    | rs3744270     | G           | $1 \times 10^{-106}$ | 0.8         | Y                       |
|       |            |                       |                       | <i>TSR1</i>        | Skin - Sun Exposed (Lower leg)       | rs4477758     | T           | $3 \times 10^{-26}$  | -0.22       | Y                       |
|       |            |                       |                       | <i>SGSM2</i>       | Skin - Sun Exposed (Lower leg)       | rs4477758     | T           | $6 \times 10^{-26}$  | -0.35       | Y                       |
|       |            |                       |                       | <i>SGSM2-AS1</i>   | Skin - Not Sun Exposed (Suprapubic)  | rs408067      | C           | $1 \times 10^{-15}$  | 0.25        | Y                       |
|       |            |                       |                       | <i>HNRNPA1P16</i>  | Nerve - Tibial                       | rs3744270     | G           | $8 \times 10^{-13}$  | -0.34       | N                       |
|       |            |                       |                       | <i>HIC1</i>        | Cells - Cultured fibroblasts         | rs3744270     | G           | $1 \times 10^{-7}$   | -0.13       | Y                       |
|       |            |                       |                       | <i>DPH1</i>        | Pancreas                             | rs9899330     | A           | $8 \times 10^{-7}$   | -0.27       | Y                       |
|       |            |                       |                       | <i>SMG6</i>        | Testis                               | rs12450028    | C           | $9 \times 10^{-7}$   | -0.14       | Y                       |
|       |            |                       |                       | <i>RTN4RL1</i>     | Heart - Left Ventricle               | rs3815469     | G           | $3 \times 10^{-5}$   | -0.25       | N                       |
| Chr21 | rs62229266 | $1.2 \times 10^{-8}$  | 4                     | <i>LINC01436</i>   | Artery - Tibial                      | rs2255858     | T           | $1 \times 10^{-78}$  | 0.93        | Y                       |
|       |            |                       |                       | <i>RPL23AP3</i>    | Cells - Cultured fibroblasts         | rs2255858     | T           | $2 \times 10^{-35}$  | 0.65        | Y                       |
|       |            |                       |                       | <i>SETD4</i>       | Cells - Cultured fibroblasts         | rs2255858     | T           | $5 \times 10^{-19}$  | 0.26        | Y                       |
|       |            |                       |                       | <i>CBR1</i>        | Nerve - Tibial                       | rs2255858     | T           | $5 \times 10^{-10}$  | 0.19        | N                       |
|       |            |                       |                       | <i>AP000688.29</i> | Artery - Tibial                      | rs2255858     | T           | $8 \times 10^{-9}$   | 0.29        | N                       |
| Chr22 | rs11705555 | $1.4 \times 10^{-8}$  | 7                     | <i>MNI</i>         | Whole Blood                          | rs73164492    | C           | $3 \times 10^{-5}$   | -0.21       | Y                       |
|       |            |                       |                       | <i>TTC28</i>       | Muscle - Skeletal                    | rs11705555    | A           | $6 \times 10^{-5}$   | -0.15       | N                       |

660

661 Candidate SNPs for causality from Table 1 were used at each locus to interrogate potential eQTL association from GTEx v8 database. For each  
662 eGene identified, the strongest association is reported (strongest tissue, SNP eQTL p-value, and effect size). Effect size sign was adjusted to  
663 represent the effect of MVP risk allele. P-values are for MVP association reported from the discovery and replication results of each locus.<sup>12</sup> Last  
664 column indicates whether the TSS of indicated eGenes is located either within 5kb of a potential causal SNP or within 5kb of a fragment that  
665 interacts topologically with potential causal SNPs, from our 4C-Seq experiments.

666 **FIGURE LEGENDS**

667 **Figure 1. Quality controls of mitral valve ATAC-Seq experiments.**

668 **A:** Number of reads (grey) and number of peaks (orange) obtained for mitral valve ATAC-Seq  
669 libraries. **B:** Spearman correlation and hierarchical clustering of mitral valve ATAC-Seq  
670 datasets. **C:** Representative read density profile of mitral valve ATAC-Seq datasets on a gene  
671 rich portion of chr1 (11,000,000 to 17,500,000, hg38 coordinates).

672

673 **Figure 2. Comparison of mitral valve, heart, and fibroblast cells ATAC-Seq datasets.**

674 **A:** Number of reads (grey) and number of peaks (orange) obtained for HDF and HCF ATAC-Seq  
675 libraries as well as heart tissues: left ventricle (Heart LV) and right atrium auricular region  
676 (Heart RAAR) raw reads obtained from ENCODE database. **B:** Proportion of ATAC-Seq peaks  
677 located to different genomic regions. **C:** Spearman correlation and hierarchical clustering of  
678 ATAC-Seq datasets from 5 mitral valve samples, 3 fibroblasts samples, and 3 heart tissue  
679 samples from left ventricle (Heart LV) or right atrium auricular region (Heart RAAR). **D:**  
680 Principal Component Analysis of 5 mitral valve, 3 fibroblast, and 3 heart ATAC-Seq datasets.  
681 Upper panel shows the position of samples with respect to first 2 principal components. Lower  
682 panel indicates the eigenvalues and explained variance of the first 10 principal components.

683

684 **Figure 3. Analysis of ATAC-Seq identifies mitral valve-specific regulatory elements and**  
685 **pathways.**

686 **A:** Volcano plot representing negative logarithm of enrichment false discovery rate (FDR) on the  
687 Y axis and logarithm of enrichment in heart samples over mitral valve samples on the X axis.  
688 Each dot represents an ATAC-Seq peak in the mitral valve or heart sample. Pink dots represent  
689 significantly enriched regions in mitral valve or heart ATAC-Seq experiments ( $FDR \leq 0.05$ ). **B-C:**  
690 Bubble graphs represent GOBP terms enriched among genes at proximity (distance to  
691  $TSS \leq 10\text{kb}$ ) of heart- (**B**) and mitral valve- (**C**) specific peaks. X and Y axes are in arbitrary  
692 semantic coordinates.<sup>25</sup> Bubble size represents number of semantically similar terms aggregated  
693 under the same index GO term. Bubble color represents the p-value of GO term enrichment for



694 the index GO term. **D-E**: Motif sequence and logo of most enriched motifs in heart- (**D**) and  
695 mitral valve- (**E**) specific peaks. Motifs were detected *de novo* using DREME algorithm. Top 3  
696 motifs are represented. E-val indicates the erased expected value (E-value) calculated by  
697 DREME. “Transcription factors” indicate the top transcription factor or transcription factor  
698 family detected by TOMTOM algorithm as possible factors binding the detected motif. “Central  
699 enrichment” represents the enrichment of motifs with respect to ATAC-Seq peak summits.

700

701 **Figure 4. rs6723013 is a potential causal variant at the *IGFBP5/TNS1* MVP-associated**  
702 **locus.**

703 **A**: Representation of MVP SNPs fold-enrichment (X-axis) and enrichment p-value (log scale, Y-  
704 axis) among indicated ATAC-Seq samples. MVP SNPs overlap with ATAC-Seq peaks was  
705 compared to 500 pools of randomized matched SNPs to calculate the indicated enrichments. **B**:  
706 Luciferase reporter gene assay comparing the regulatory activity of constructs containing  
707 rs6723013-region (T and G alleles) and a control region. The p-value of a student’s t-test  
708 comparing luciferase values of rs6723013 alleles is indicated. **C-D**: Conditional analysis at  
709 *IGFBP5/TNS1* locus. LocusZoom plots represent MVP association before (**C**) and after (**D**)  
710 conditioning on rs6723013.

711

712 **Figure 5. 4C-Seq analysis of the *SMG6/SRR* MVP-associated locus.**

713 Interacting fragment density profiles from SNP rs2641440, rs9898819, rs2281727, and  
714 rs9899330 viewpoints using 4C-Seq. Fragments in significant interaction with the viewpoint are  
715 indicated by black bars under the interaction plot. Genomic coordinates, GRCh38.

716

**Fig 1**

**A**

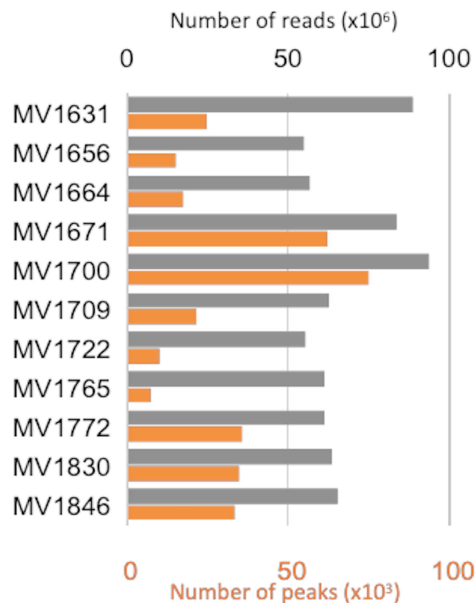

**B**

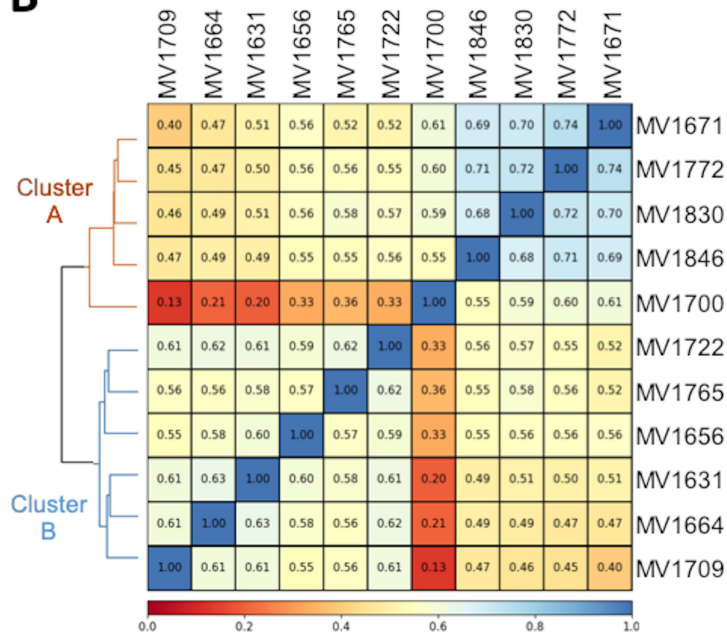

**C**

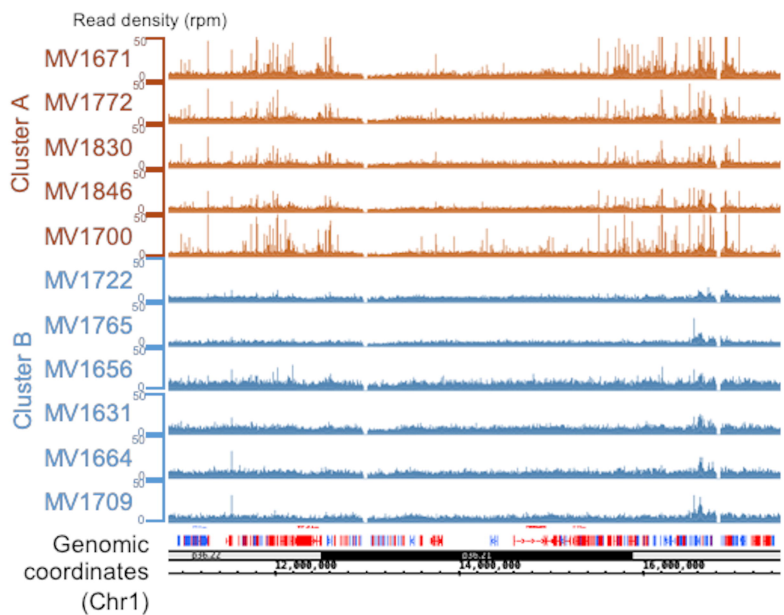

Fig 2

**A**

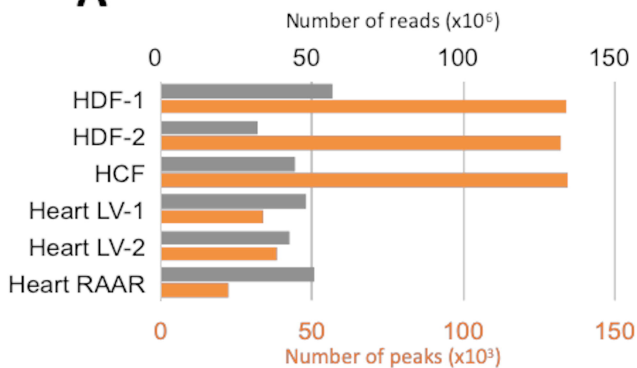

**B**

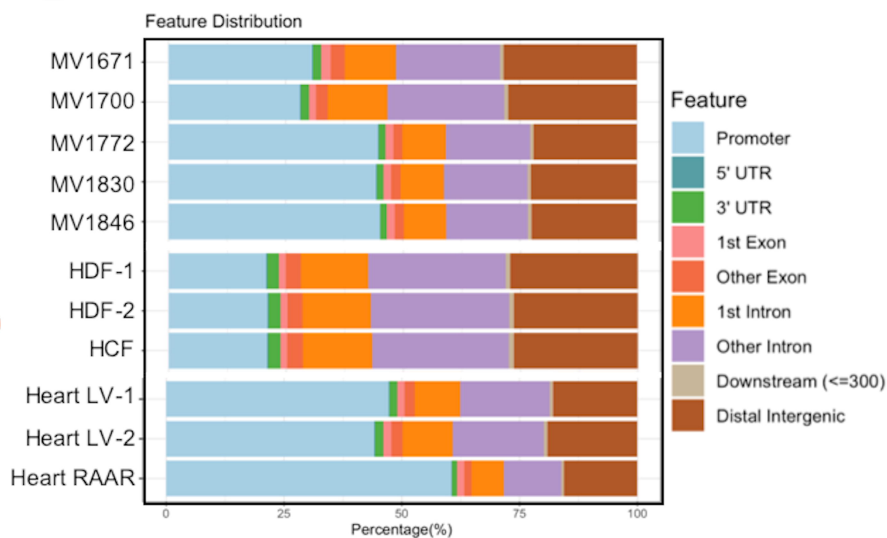

**C**

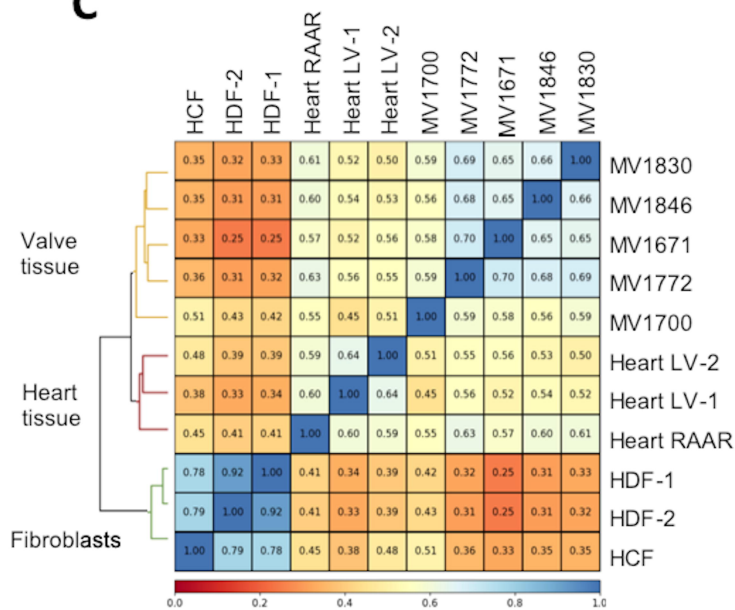

**D**

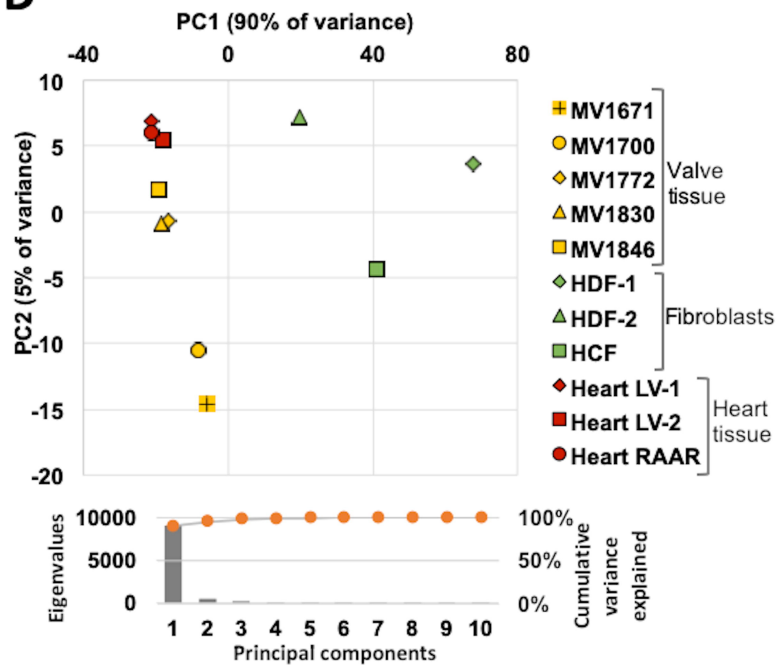

Fig 3

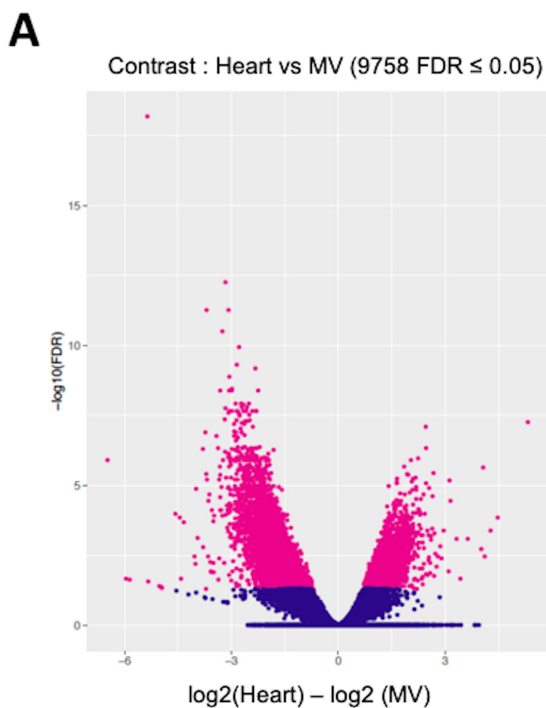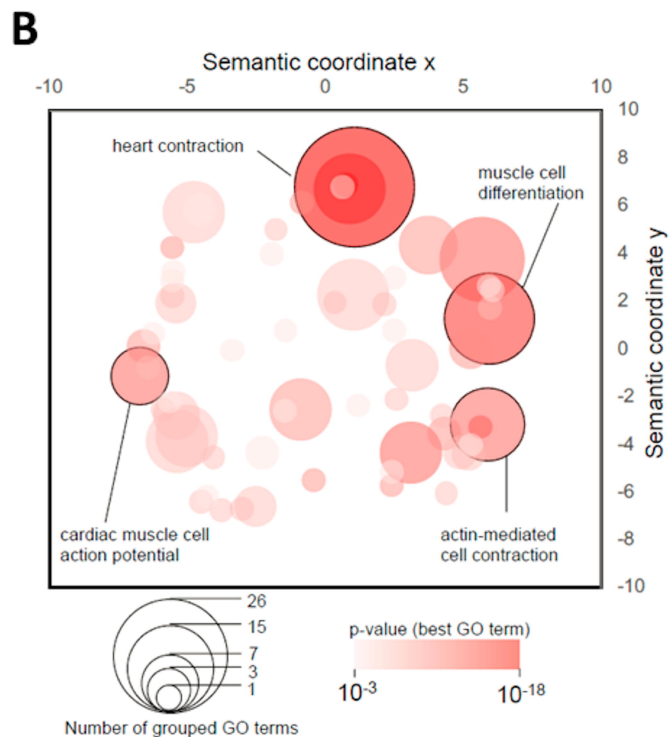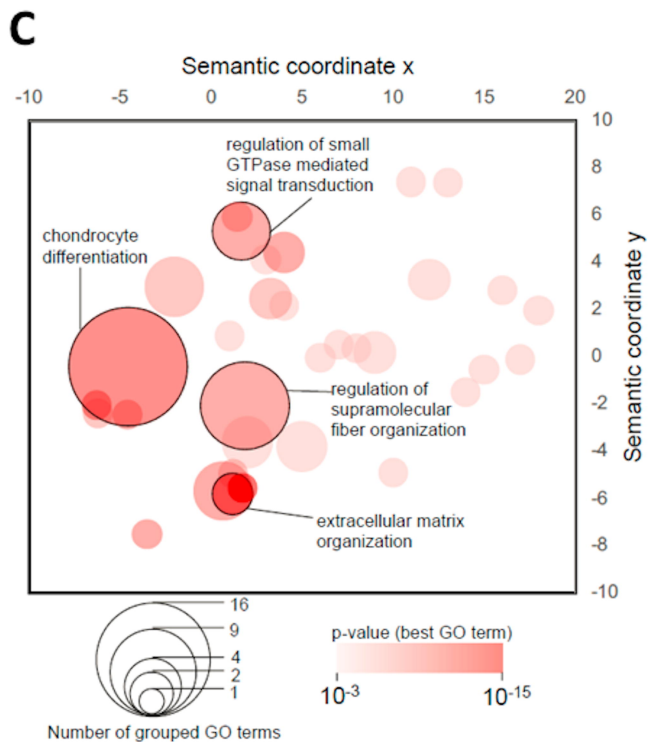

**D**

|    | Motif    | Logo fw | Logo rv | E-val      | Transcription factors | Central enrichment     |
|----|----------|---------|---------|------------|-----------------------|------------------------|
| 1. | GCGGGRGM |         |         | $1.7e-056$ | KLF                   |                        |
| 2. | AWATAR   |         |         | $3.8e-032$ | MEF2                  | Not Centrally Enriched |
| 3. | HGTCA Y  |         |         | $2.2e-023$ | PAX2/<br>JUN/...      |                        |

**E**

|    | Motif   | Logo fw | Logo rv | E.val      | Transcription factors | Central enrichment     |
|----|---------|---------|---------|------------|-----------------------|------------------------|
| 1. | DGGA AW |         |         | $4.5e-061$ | NFATC                 | Not Centrally Enriched |
| 2. | DGCCAR  |         |         | $7.3e-052$ | NFIC/<br>NFIB/<br>... |                        |
| 3. | AMAYA   |         |         | $7.7e-037$ | FUBP1                 | Not Centrally Enriched |

**Fig 4****A**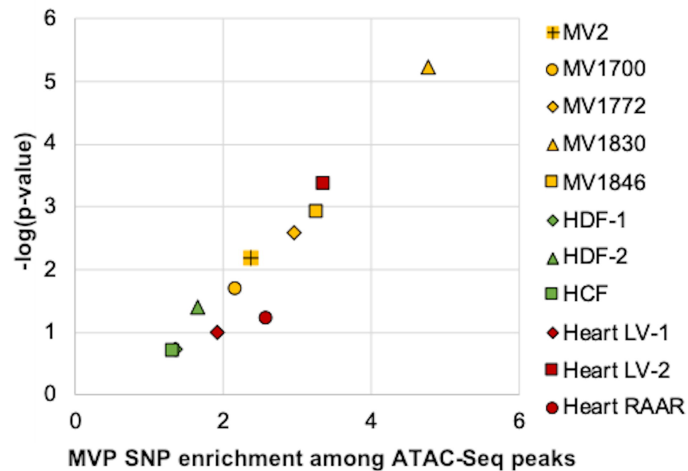**B**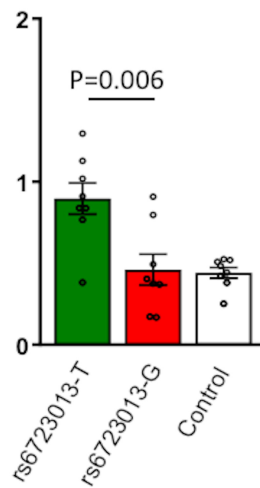**C**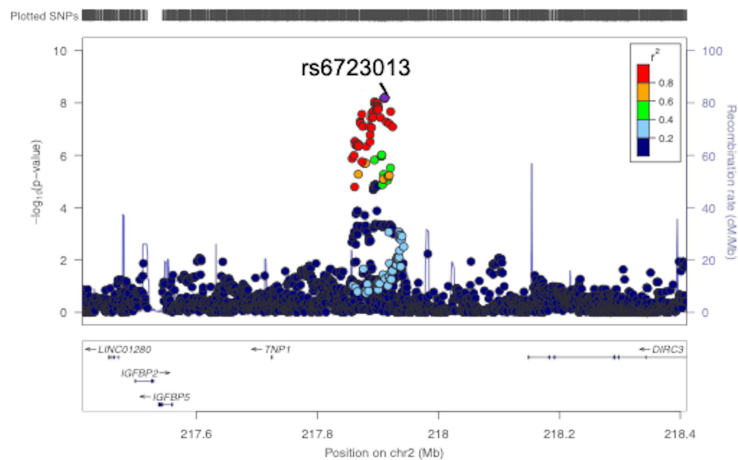**D**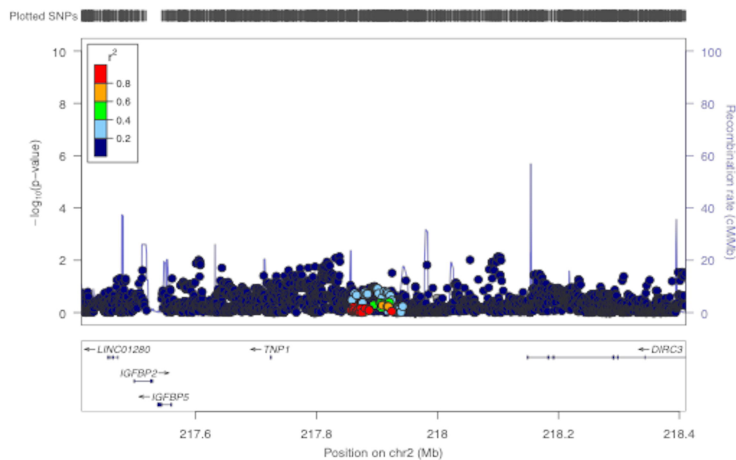

Fig 5

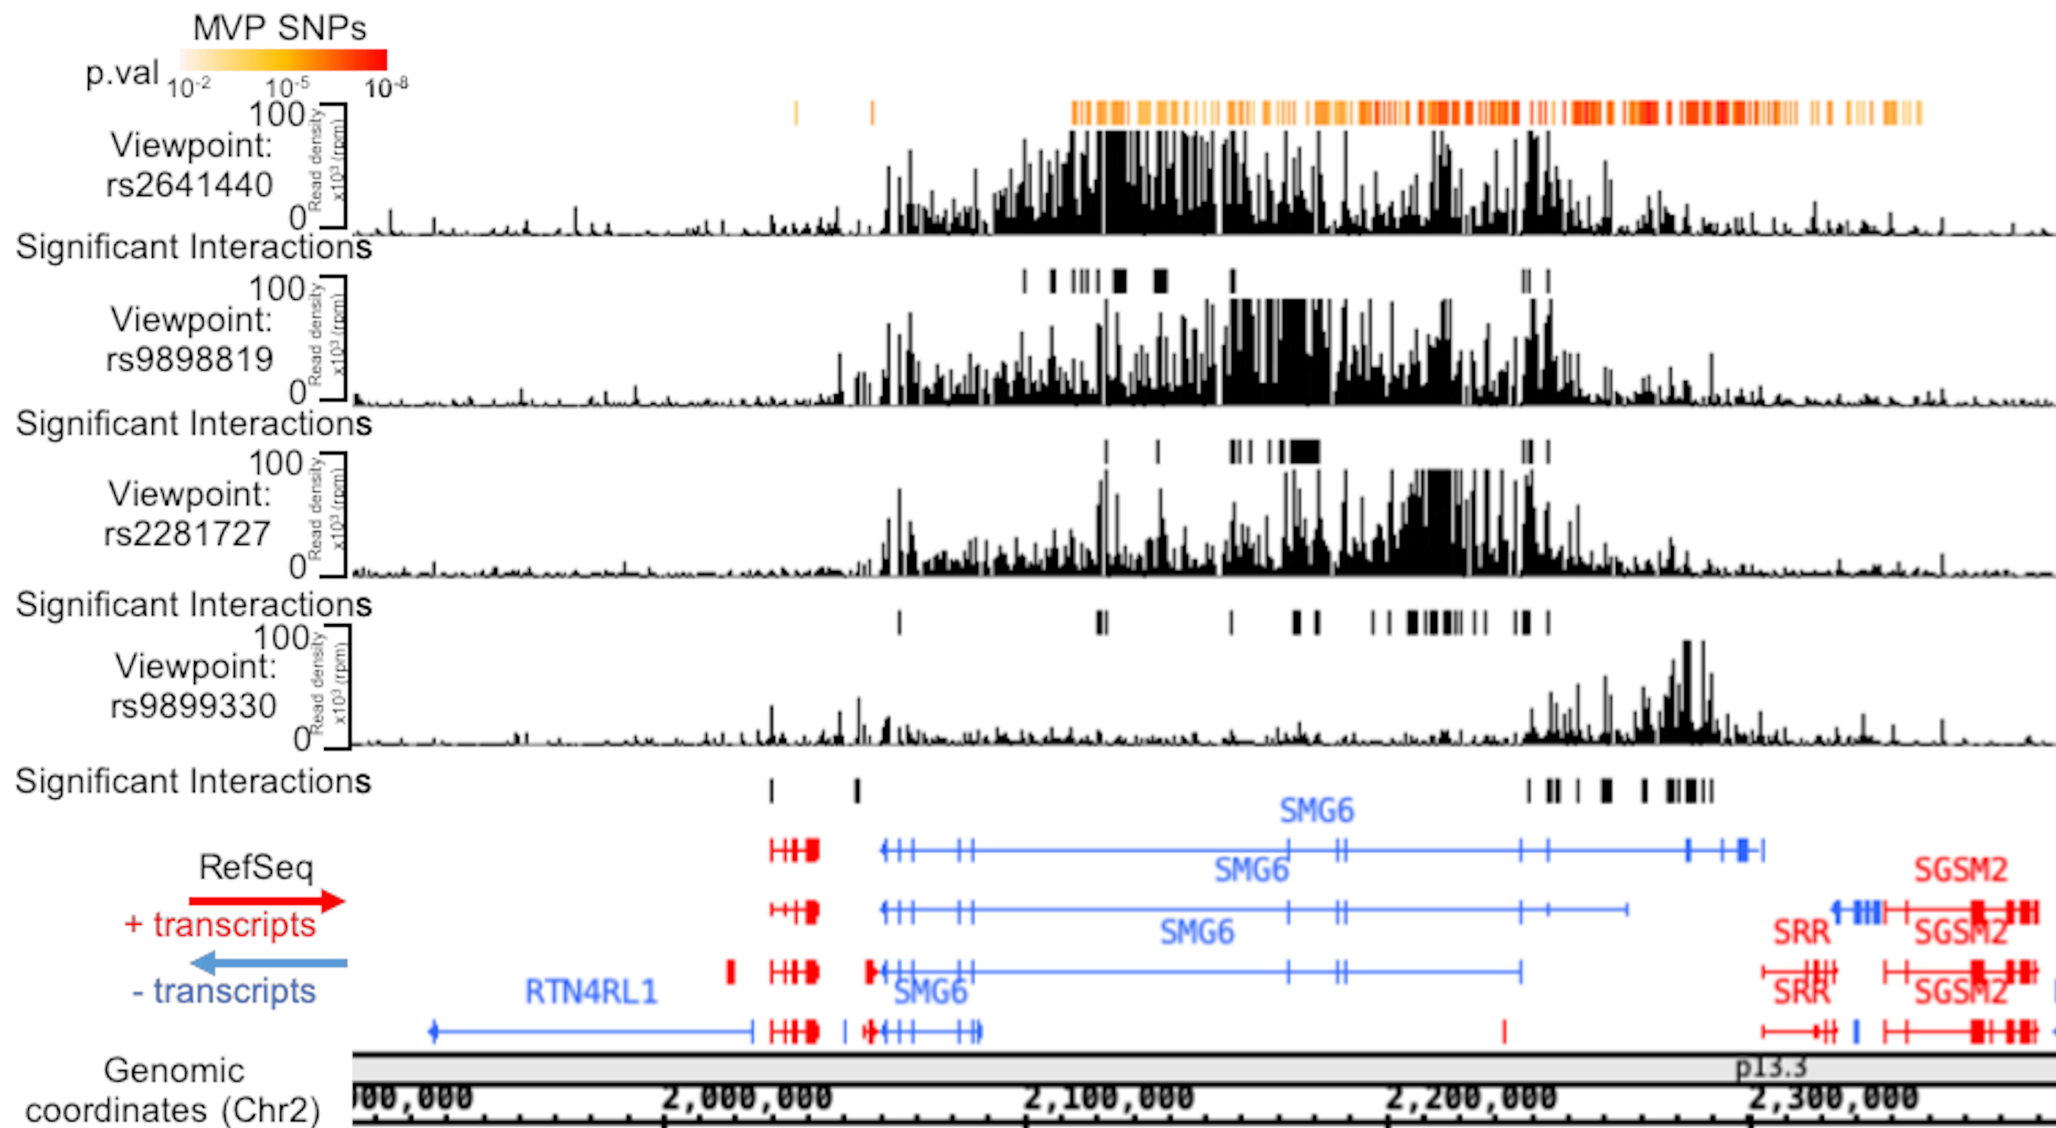

Fig S1

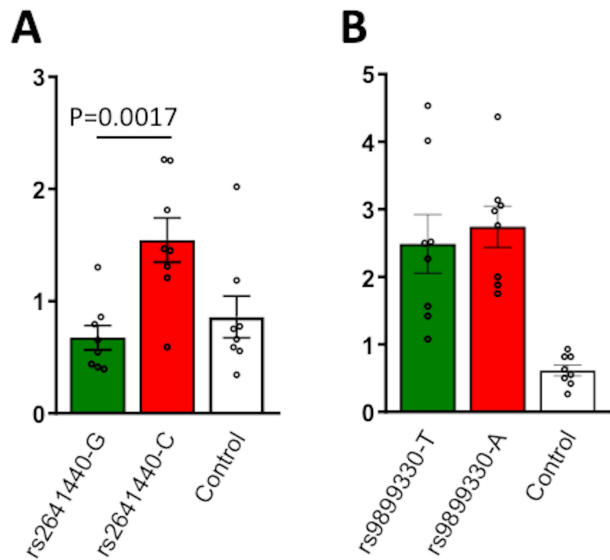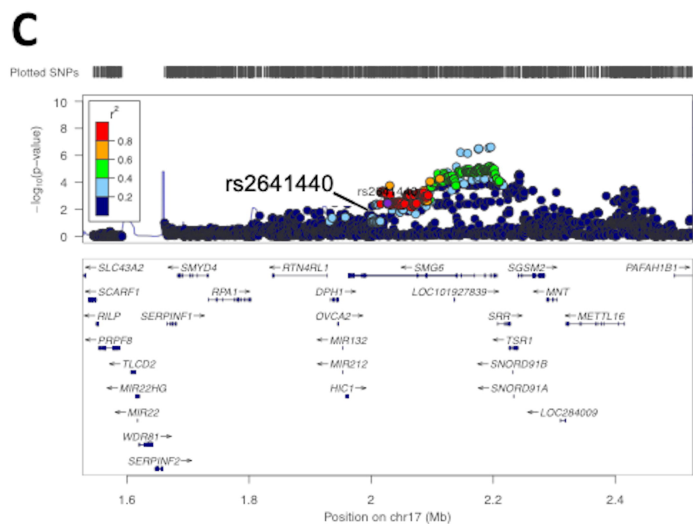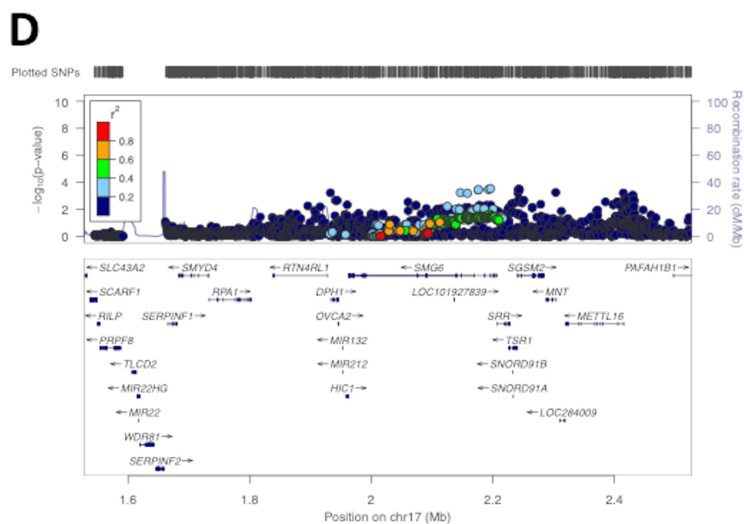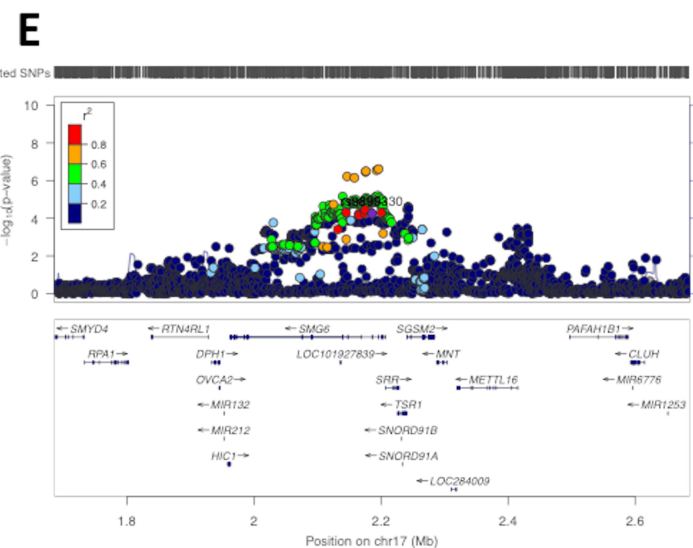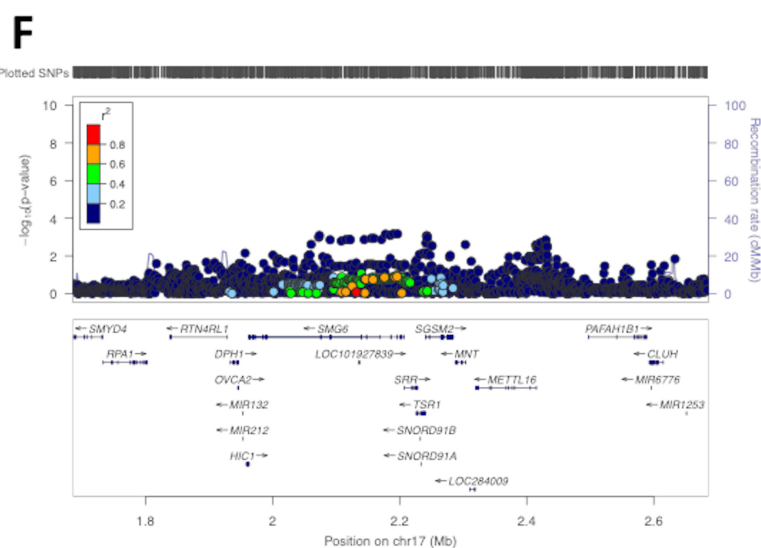

Fig S2

**A**

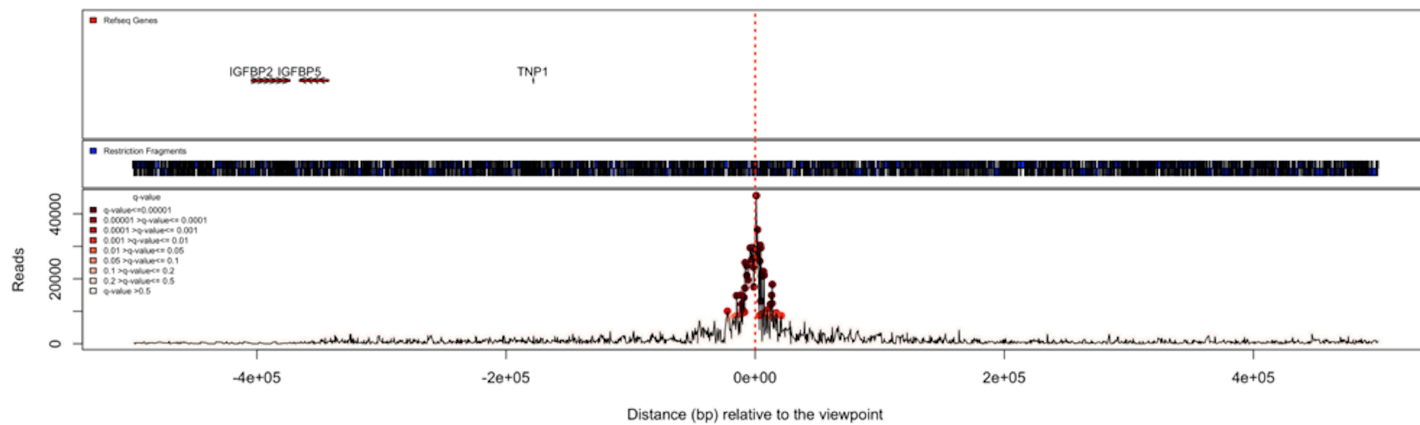

**B**

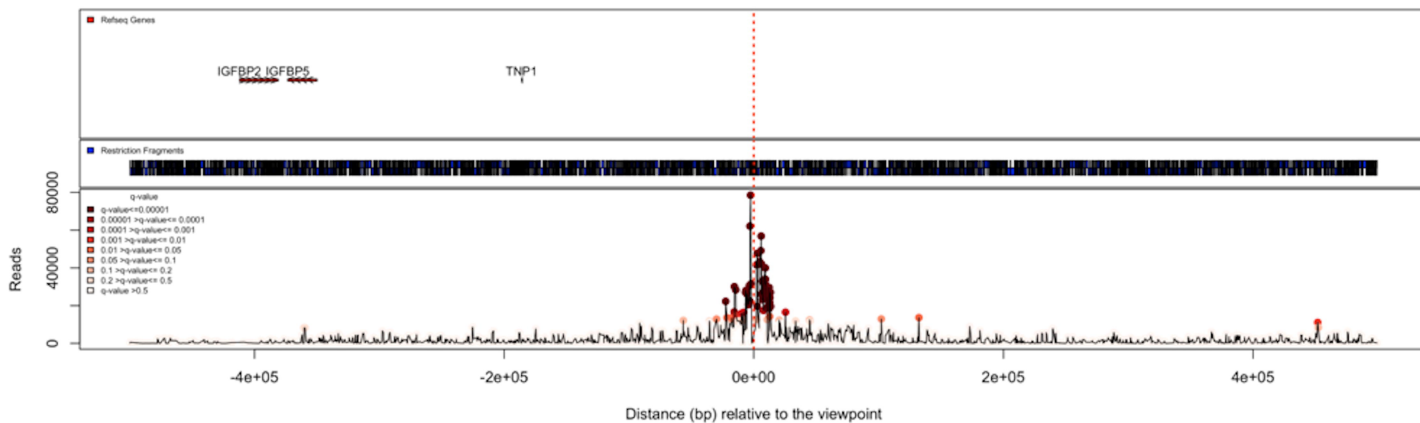

**C**

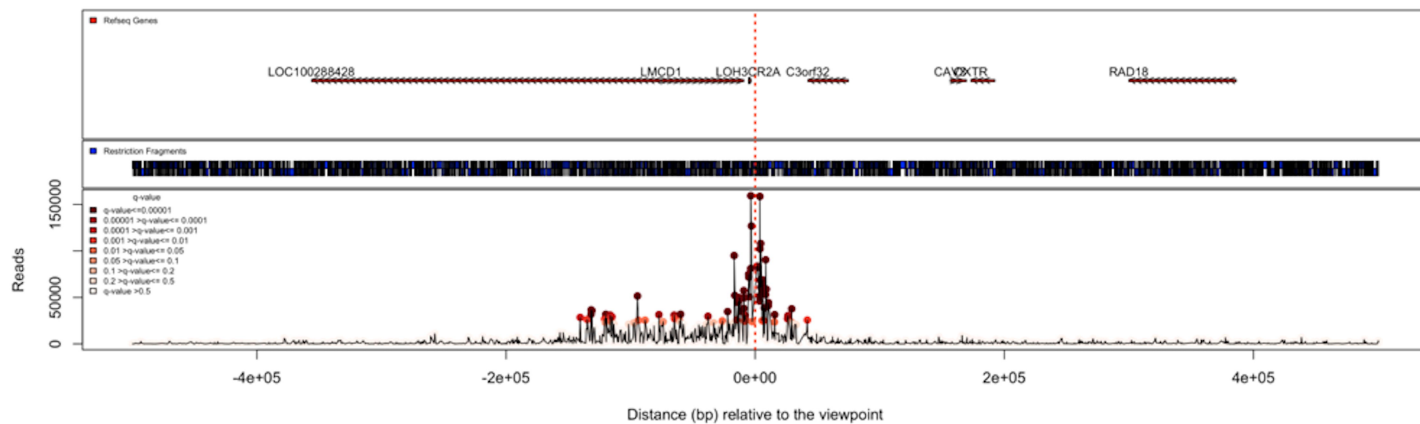



Fig S3

**A**

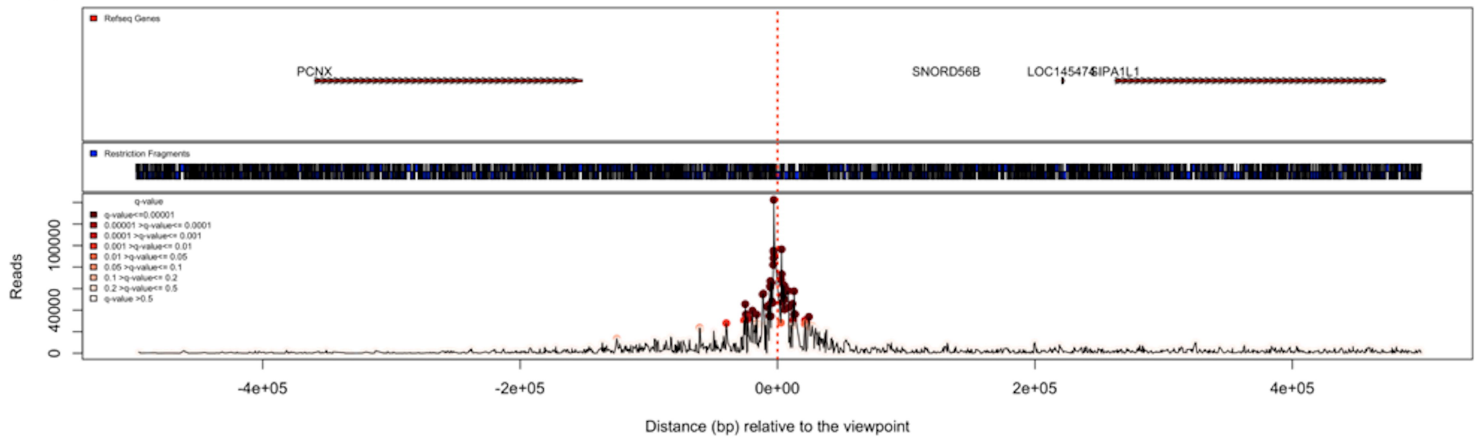

**B**

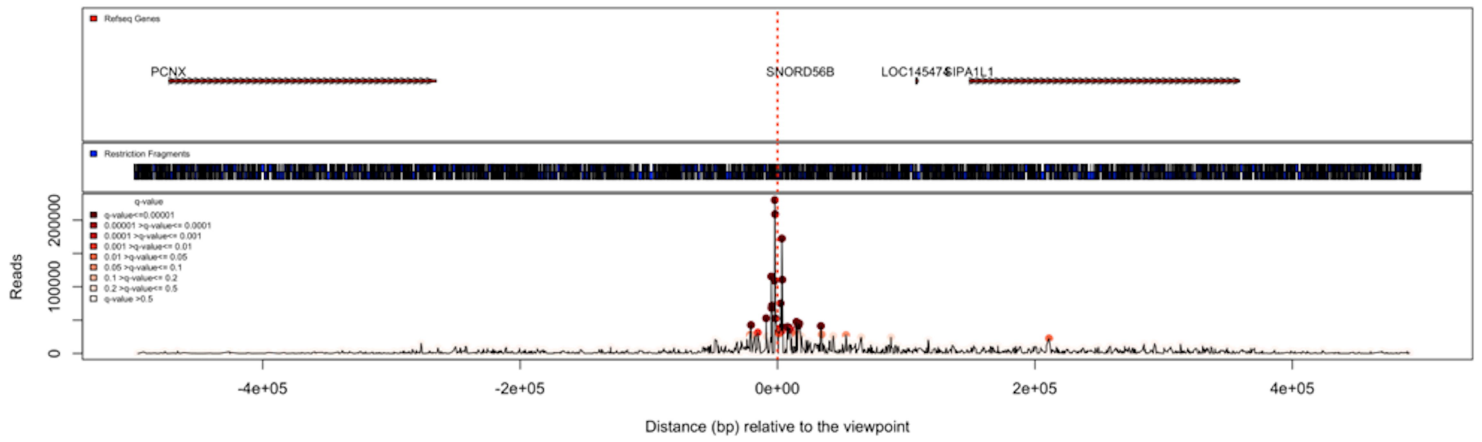

**C**

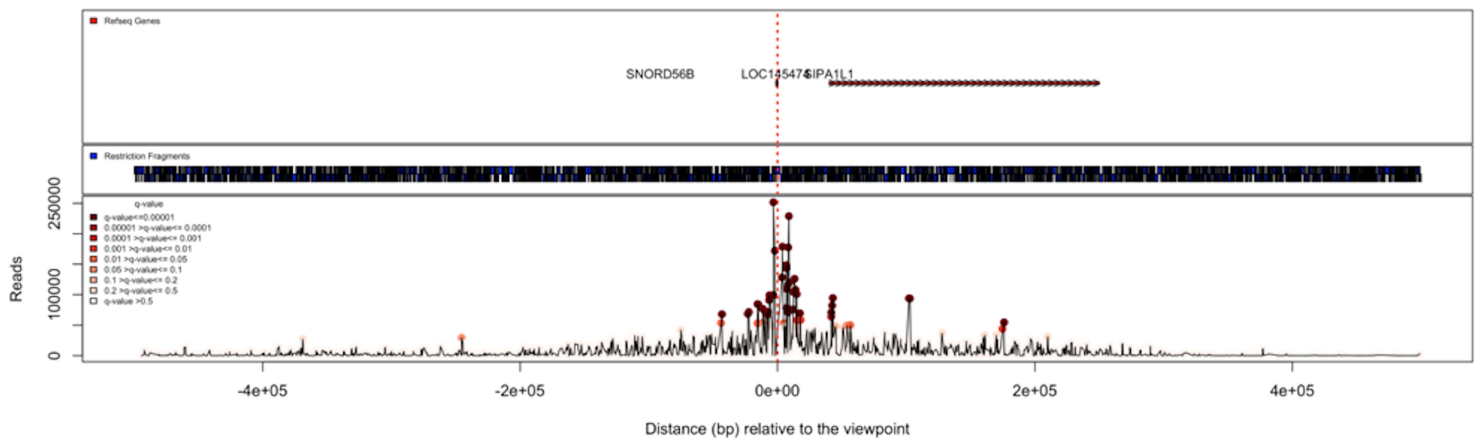

**D**

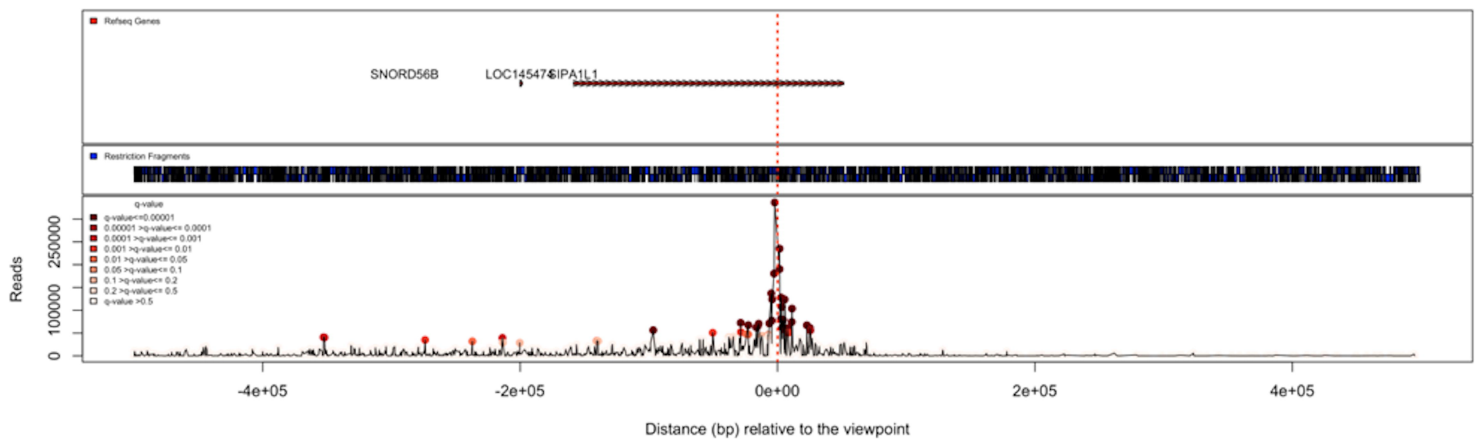



Fig S5

**A**

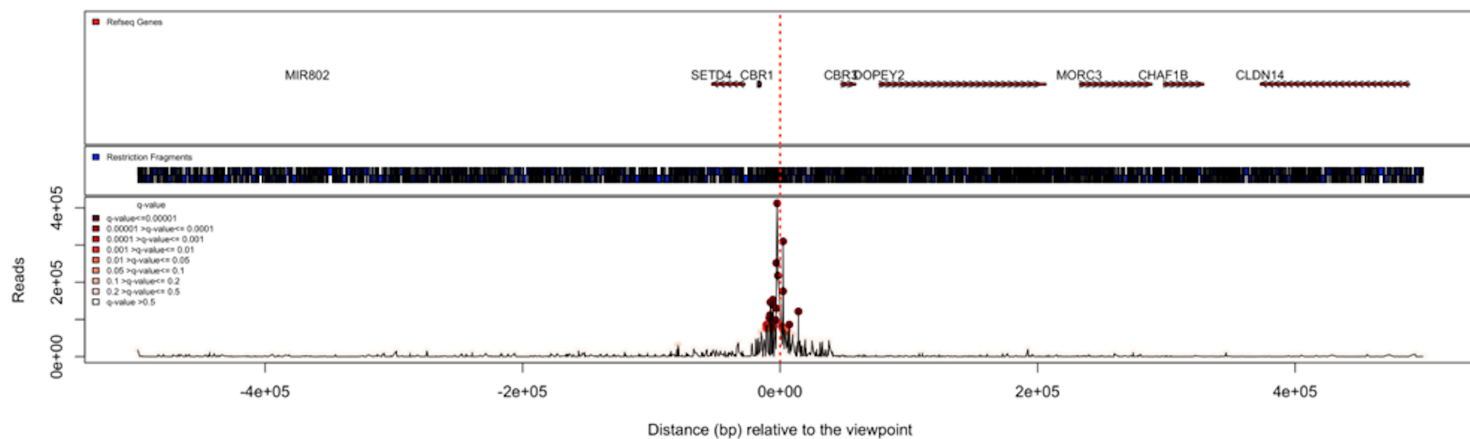

**B**

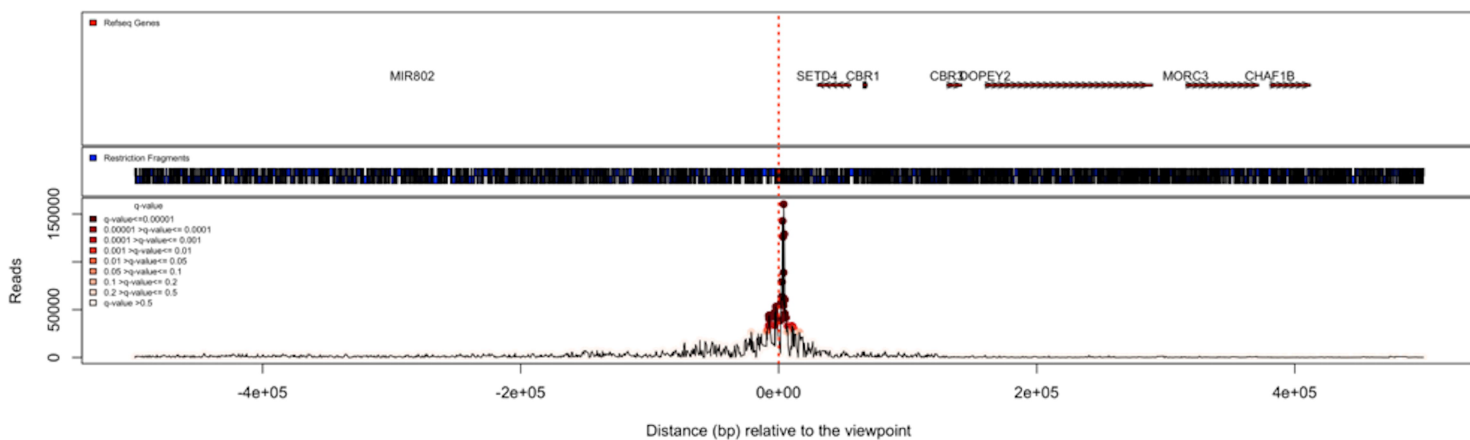

**C**

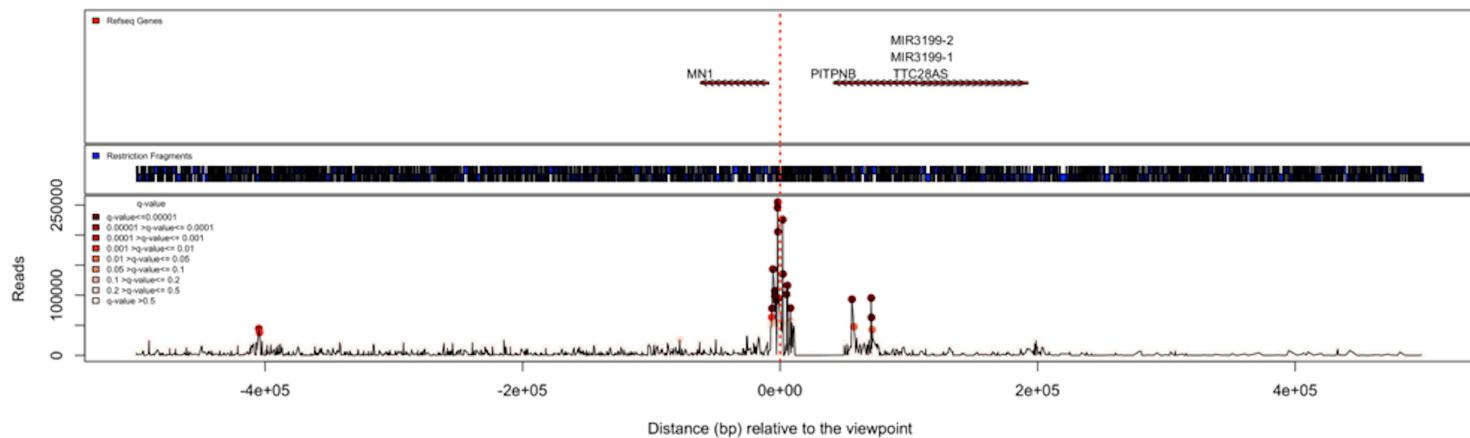

Source: https://medrxiv.org/content/10.1101/2020.06.04.20122010v1.full.pdf
